1           **Non-canonical, potassium-driven cerebrospinal fluid clearance**

2       Huixin Xu<sup>1,‡</sup>, Ryann M Fame<sup>1,‡</sup>, Cameron Sadegh<sup>1,2</sup>, Jason Sutin<sup>3</sup>, Christopher Naranjo<sup>4</sup>, Della  
3       Syau<sup>4</sup>, Jin Cui<sup>1</sup>, Frederick B Shipley<sup>1,5</sup>, Amanda Vernon<sup>6</sup>, Fan Gao<sup>6,†</sup>, Yong Zhang<sup>7</sup>, Michael J.  
4                       Holtzman<sup>7</sup>, Myriam Heiman<sup>6</sup>, Benjamin C Warf<sup>8</sup>, Pei-Yi Lin<sup>3</sup>,  
5                                       Maria K Lehtinen<sup>1,5 \*</sup>

6  
7       <sup>1</sup>Department of Pathology, Boston Children’s Hospital, Boston, MA 02115, USA

8       <sup>2</sup>Department of Neurosurgery, Massachusetts General Hospital and Harvard Medical School,  
9       Boston, MA 02114, USA

10      <sup>3</sup>Fetal-Neonatal Neuroimaging and Developmental Science Center, Division of Newborn  
11      Medicine, Boston Children’s Hospital, Harvard Medical School, 300 Longwood Avenue, Boston,  
12      MA 02115, USA

13      <sup>4</sup>Summer Honors Undergraduate Research Program, Division of Medical Sciences, Harvard  
14      Medical School, Boston, MA 02115, USA

15      <sup>5</sup>Graduate Program in Biophysics, Harvard University, Cambridge, MA 02138, USA

16      <sup>6</sup>Broad Institute of MIT and Harvard, Cambridge, MA 02142; Picower Institute for Learning and  
17      Memory, Cambridge, MA 02139; Department of Brain and Cognitive Sciences, Massachusetts  
18      Institute of Technology, Cambridge, MA 02139, USA

19      <sup>7</sup>Pulmonary and Critical Care Medicine, Department of Medicine, Washington University, St.  
20      Louis, MO 63110, USA

21      <sup>8</sup>Department of Neurosurgery, Boston Children’s Hospital, Boston, MA 02115, USA

22      <sup>‡</sup>These authors contributed equally.

23      <sup>†</sup>Current address: Bioinformatics Resource Center in the Beckman Institute at Caltech, Pasadena,  
24      CA 91125, USA

25      \*Correspondence should be addressed to: [maria.lehtinen@childrens.harvard.edu](mailto:maria.lehtinen@childrens.harvard.edu)

26

27 **ABSTRACT**

28 Cerebrospinal fluid (CSF) provides vital support for the brain. Abnormal CSF  
29 accumulation is deleterious for perinatal neurodevelopment, but how CSF leaves the brain during  
30 this critical period is unknown. We found in mice a postnatal neurodevelopmental transition  
31 phase featuring precipitous CSF  $K^+$  clearance, accompanied by water, through the choroid plexus  
32 (ChP). The period corresponds to a human fetal stage when canonical CSF clearance pathways  
33 have yet to form and congenital hydrocephalus begins to manifest. Unbiased ChP metabolic and  
34 ribosomal profiling highlighted this transition phase with increased ATP yield and activated  
35 energy-dependent  $K^+$  transporters, in particular the  $Na^+-K^+-Cl^-$  and water cotransporter NKCC1.  
36 ChP-targeted NKCC1 overexpression enhanced  $K^+$ -driven CSF clearance and enabled more  
37 permissive cerebral hydrodynamics. Moreover, ventriculomegaly in an obstructive  
38 hydrocephalus model was improved by ChP-targeted NKCC1 overexpression. Collectively, we  
39 identified  $K^+$ -driven CSF clearance through ChP during a transient but critical  
40 neurodevelopmental phase, with translational value for pathologic conditions.

41

42 **Keywords:** cerebrospinal fluid; clearance; potassium; choroid plexus; development; NKCC1;  
43 hydrocephalus

44

## 45 INTRODUCTION

46 A balance between cerebrospinal fluid (CSF) production and clearance (influx/efflux) is  
47 essential for normal brain function and development (Fame and Lehtinen, 2020). Disrupted CSF  
48 volume homeostasis with excessive CSF accumulation is implicated in many pediatric brain  
49 disorders, in particular congenital hydrocephalus (Kahle et al., 2016), where patients suffer from  
50 a potentially life-threatening accumulation of CSF and frequently develop neurological deficits  
51 that last through childhood and into adult life (Vinchon et al., 2012). Schizophrenia patients can  
52 have enlarged lateral ventricles by their first episode of psychosis (Steen et al., 2006), and in  
53 some cases as early as infancy (Gilmore et al., 2010), suggesting a role for CSF clearance  
54 abnormalities in this and possibly other neurodevelopmental disorders. As another example,  
55 autism spectrum disorders are associated with altered CSF distribution patterns and enlarged  
56 CSF space surrounding the brain (Shen et al., 2017). A better understanding of developing CSF  
57 dynamics may help explain why early phases of brain development (e.g. from third trimester to 6  
58 months after birth in human) represent a period of high vulnerability to certain congenial  
59 disorders (Volpe, 2008, Gilmore et al., 2010, Shen et al., 2017).

60 Critically, how CSF is cleared during this perinatal period remains a mystery. Progress in  
61 CSF dynamics research has identified several CSF clearance routes including arachnoid  
62 granulations, perineural and paravascular pathways, and meningeal lymphatics (Antila et al.,  
63 2017, Munk et al., 2019, Fame and Lehtinen, 2020). However, these systems only fully appear at  
64 later stages of life (up to 2 years in human and several weeks postnatal in mice) (Antila et al.,  
65 2017, Munk et al., 2019), and therefore are not available to contribute to CSF dynamics during  
66 these critical early phases. Identifying and manipulating the early endogenous CSF clearance  
67 mechanisms could provide one powerful approach for tackling neurodevelopmental disorders

68 involving CSF dysregulation, and may also be applied to fluid disorders affecting adults.

69 To identify how early CSF is cleared, we investigated tissues with the ability to modulate  
70 CSF at this stage. The choroid plexus (ChP) is an intraventricular epithelial structure that forms  
71 the majority of the blood-CSF barrier and develops prenatally. It contains diverse ion and fluid  
72 transporters along its vast surface area capable of bidirectional transport (Damkier et al., 2013).  
73 Although the prevailing model posits that the ChP provides net unidirectional, luminal secretion  
74 of ions and water to form CSF, insufficient corroborating data have been collected under  
75 physiological experimental conditions. Furthermore, historical clinical observations suggest  
76 some absorptive functions of the ChP (Milhorat et al., 1970) which is supported by animal  
77 studies (Oreskovic et al., 2017). Finally, broad transcriptional changes of the machinery  
78 regulating fluid/ion transport support the concept of temporally dynamic and possibly context-  
79 dependent ChP functions in determining net directionality of CSF transport (Liddelow et al.,  
80 2013, Delpire and Gagnon, 2019).

81 To further explore potentially absorptive properties of the ChP, we studied the expression  
82 of transporters, the energetic systems and ionic gradients that govern their activity, and their  
83 physiological effects across the timespan of early postnatal development in mice. Taken together  
84 our data support a novel role and mechanism for CSF clearance by the  $\text{Na}^+\text{-K}^+\text{-Cl}^-$  and water co-  
85 transporter, NKCC1, in the apical membrane of the ChP during a specific developmental period.  
86 These results have implications for the pathophysiology of congenital disorders accompanied by  
87 dysregulated CSF and could inform strategies for treatment of neonatal hydrocephalus and  
88 perhaps other disorders.

89

## 90 **RESULTS**

### 91 **CSF K<sup>+</sup> declines precipitously during a specific perinatal period**

92 We discovered a unique and transient phase of neurodevelopment when CSF [K<sup>+</sup>]  
93 decreased rapidly. We used inductively coupled plasma optical emission spectrometry (ICP-OES)  
94 and ion chromatography (IC) to measure levels of key ions likely to govern CSF flux including  
95 Na<sup>+</sup>, K<sup>+</sup>, and Cl<sup>-</sup> at several developmental timepoints. CSF [K<sup>+</sup>] was remarkably high at birth  
96 ( $9.6 \pm 3.5$  mM), decreased rapidly to  $4.4 \pm 0.9$  mM by P7 (**Fig. 1A**), and later achieved adult  
97 levels of  $3.1 \pm 0.6$  mM (**Fig. 1A**) while [Na<sup>+</sup>] and [Cl<sup>-</sup>] were minimally changed (**Fig. 1B**). The  
98 reduction in CSF K<sup>+</sup> was consistent with previous reports in other species (Saunders et al., 2018)  
99 and correlated with parallel changes in serum [K<sup>+</sup>] such that the ratio between blood and CSF  
100 [K<sup>+</sup>] remained stable (**Fig. 1C**).

101 Notably, K<sup>+</sup> transport has been associated with water co-transport by several K<sup>+</sup>  
102 transporters in various tissues and cell types (Zeuthen, 1994, Hamann et al., 2010, Zeuthen and  
103 Macaulay, 2012), suggesting that CSF [K<sup>+</sup>] changes could drive water movement in the brain as  
104 well. Therefore, we sought to identify mechanisms underlying this fast clearance of CSF K<sup>+</sup>,  
105 which may shed light on CSF outflow during this time.

106

### 107 **ChP metabolism increases during the early postnatal transition phase**

108 We found that the transitional period of rapid CSF K<sup>+</sup> clearance coincided with high ChP  
109 metabolism. We reasoned that K<sup>+</sup> clearance during this period could be ChP-mediated because  
110 the ChP expresses high levels of K<sup>+</sup> co-transporters on its large CSF-contacting surface area  
111 (Keep and Jones, 1990, Damkier et al., 2013). Similar to water and ion transport by other  
112 epithelial structures such as kidney proximal and distal tubes (Bhargava and Schnellmann, 2017),

113  $K^+$  clearance from CSF by the ChP would be energy-dependent and therefore be accompanied by  
114 upregulation of ATP production and mitochondrial activity. Therefore, we evaluated the  
115 metabolic status and ATP production capacity of the ChP epithelium before, during, and after the  
116 time period of CSF  $[K^+]$  reduction. We found that both mitochondria number and size increased  
117 from E16.5 to 2mo (**Fig. 1D-G**), while cellular glycogen load gradually decreased  
118 (**Supplementary Fig. 1**). Both observations are consistent with reports from ChP in other  
119 mammalian species (Netsky and Shuangshoti, 1975, Keep and Jones, 1990) and suggest  
120 functional changes in ChP oxidative metabolism. To assess this we monitored oxygen  
121 consumption to calculate basal metabolism and ATP production at embryonic day 16.5 (E16.5),  
122 postnatal day 0 (P0), P7, and adult (2 months old (2mo)) ChP explants using Agilent Seahorse  
123 XFe technology (**Fig. 1H, Supplementary Fig. 2**). We found that E16.5 ChP had the lowest  
124 basal respiration of all tested ages (**Fig. 1I, Supplementary Fig. 2**). Adult had a higher capacity  
125 for overall ATP production than E16.5 ChP, but surprisingly, P0-P7 ChP were the most  
126 metabolically active as per ATP production (**Fig. 1I, J**). In addition, mitochondrial subcellular  
127 distribution in ChP epithelium was biased toward the apical surface as postnatal development  
128 proceeded, with E16.5 mitochondria heavily distributed along the basal side of epithelial cells,  
129 P0 mitochondria intermediately localized, and P7 and 2mo mitochondria having more apical  
130 distribution (**Fig. 1K-M, Supplementary Fig. 3**). Mitochondrial subcellular localization  
131 responds to regional energy demand in other cellular processes such as migration of mouse  
132 embryonic fibroblasts and during axonal outgrowth (Schuler et al., 2017, Smith and Gallo, 2018).  
133 Together with the increase in ATP production postnatally, the shift in ChP epithelial  
134 mitochondria distribution over postnatal development suggests increasing ATP supply to meet  
135 high demand at the apical ChP surface during the early postnatal phase, concurrent with the rapid

136 clearance of CSF  $K^+$ . This concurrence prompted us to investigate energy-dependent  
137 mechanisms whereby ChP epithelial cells might contribute to  $K^+$  clearance.

### 138 **The ChP increases production of CSF-facing ion and water transporters postnatally**

139 Consistent with rapid CSF  $K^+$  clearance and high ChP metabolism, we found that  
140 expression of the energy-dependent cation transport pathway components were upregulated in  
141 ChP postnatally. To unbiasedly identify candidates controlling postnatal CSF clearance through  
142 the ChP, we conducted ribosomal profiling to investigate transcripts that are prioritized for  
143 translation in embryonic (E16.5) and adult (2 mo) ChP, using Translating Ribosomal Affinity  
144 Purification (TRAP; Heiman et al., 2008). ChP epithelial cells were targeted by crossing  
145 *FoxJ1:cre* mice (Zhang et al., 2007) with *TRAP (EGFP:L10a)* mice (Heiman et al., 2008) (**Fig.**  
146 **2A, Supplementary Fig. 4A, B**), and mRNA associated with the L10a ribosomal subunit were  
147 purified for sequencing.

148 TRAP analyses revealed 1967 differentially translated transcripts (adjusted  $p < 0.05$ )  
149 between E16.5 and 2mo adult ChP: 1119 enriched at E16.5 and 847 enriched at 2mo (**Fig. 2B**).  
150 Gene set and pathway analyses revealed developmentally regulated ChP programs. Adult (2mo)  
151 ChP had enriched functional gene sets associated with active transmembrane membrane  
152 transport and mitochondria, which is consistent with our abovementioned findings on  
153 metabolism changes (**Fig. 2C**). Specifically, cation transport was enriched, supporting the  
154 hypothesis of ChP mediating CSF  $K^+$  transport postnatally (**Fig. 2C, D**). Enriched pathways in  
155 the 2mo adult included secretion associated pathways named for other, better studied secretory  
156 processes, including salivary and pancreatic secretion, all of which have a special emphasis on  
157 water and ion transmembrane transport (**Supplementary Fig. 4C (red), D**). Consistent with a  
158 rise in fluid and ion modulating machinery, there was a striking enrichment of more

159 transmembrane and signal peptide-containing transcripts in adult ChP (**Supplementary Fig. 4E,**  
160 **F**). These results indicate that the ChP specifically gained fluid and ion modulatory functions  
161 postnatally.

162

### 163 **NKCC1 is poised to mediate perinatal ChP CSF K<sup>+</sup> and water clearance**

164 Among all fluid and ion modulating candidates with increasing postnatal expression  
165 (**Supplementary Fig. 4G, H**), we identified NKCC1 (*Slc12a2*) as the candidate most likely to  
166 mediate CSF clearance. NKCC1 is functionally related to Na<sup>+</sup>/K<sup>+</sup>-ATPase (*Atp1a1* and *Atp1b1*),  
167 as the latter actively maintains the Na<sup>+</sup>/K<sup>+</sup> gradient that powers NKCC1. Both Na<sup>+</sup>/K<sup>+</sup>-ATPase  
168 and NKCC1 are capable of CSF K<sup>+</sup> clearance, but NKCC1 was of particular interest because (1)  
169 it is a co-transporter of K<sup>+</sup> and water (Zeuthen and Macaulay, 2012, Steffensen et al., 2018); and  
170 (2) the activity of NKCC1 can be further modified by phosphorylation (Darman and Forbush,  
171 2002), lending additional control to its fluid/ion modulatory capacity. In addition, NKCC1 is  
172 particularly enriched in the ChP and does not impact broad functionality like the Na<sup>+</sup>/K<sup>+</sup>-ATPase  
173 does, both of which are ideal features for a functional therapeutic intervention target. We refined  
174 our temporal expression analyses of NKCC1, ATP1a1, ATP1b1, and Klotho (*Kl*), which  
175 contributes to the membrane localization of the Na<sup>+</sup>/K<sup>+</sup>-ATPase (Razzaque, 2008, Sopjani et al.,  
176 2011) (**Fig. 2E**), by sampling weekly from P0 to P28 and then at 2mo and confirmed increased  
177 expression of transcript and protein for each component across developmental time (**Fig. 2F, G,**  
178 **Supplementary Fig. 5**). The observed changes in NKCC1 total protein were corroborated by an  
179 independent approach where the rate of ChP epithelial cell swelling under high [K<sup>+</sup>] challenge  
180 (Steffensen et al., 2018) reflected the abundance of NKCC1 protein (**Fig. 2H-J, Supplementary**  
181 **Fig. 6**).



182 In addition, we found particularly high levels of phosphorylated, therefore activated  
183 (Darman and Forbush, 2002), NKCC1 (pNKCC1) in the ChP of P0-P7 pups, with P7 having  
184 peak pNKCC1 levels among all postnatal ages, indicative of increased NKCC1 activity during  
185 the first postnatal week (**Fig. 2G**). Similar to the timeline of ChP ATP production (**Fig. 1J**), the  
186 timeframe of high ChP pNKCC1 was concurrent with the fast CSF  $[K^+]$  decrease during the first  
187 postnatal week (**Fig. 1A**), suggesting a functional correlation and further confirming the  
188 significance of the early postnatal transitional period. Taken together, we identified ChP NKCC1  
189 as the top candidate for mediating postnatal CSF  $K^+$  and water clearance.

190

### 191 **NKCC1 temporal regulation requires epigenetic control that is implicated in congenital** 192 **hydrocephalus**

193 We found that the temporal profile of NKCC1 expression was tightly regulated at the  
194 epigenetic level by modulators implicated in some forms of congenital hydrocephalus. The  
195 NuRD complex governs differentiation and maturation of diverse cells and tissues (Goodman  
196 and Bonni, 2019). Our previously published RNA sequencing studies (Lun et al., 2015)  
197 identified NuRD components, including the ATPase CHD family members (Chd4 being the most  
198 highly expressed), the histone deacetylases HDAC1/2, and methyl CpG-binding domain protein  
199 MBD3 in the ChP (**Fig. 3A**). *De novo* loss-of-function CHD4 mutations are implicated in some  
200 groups of children with congenital hydrocephalus and ventriculomegaly (Weiss et al., 2020). We  
201 found that CHD4 localized to nuclei in mouse ChP epithelial cells beginning at P0 (**Fig. 3B**).  
202 Immunoprecipitation of CHD4 identified HDAC1, HDAC2, and MBD3 by immunoblotting in  
203 mouse ChP (**Fig. 3C**, technical control for Co-IP protocol is shown in **Supplementary Fig. 7**),  
204 confirming the existence of the CHD4/NuRD complex in developing ChP. We then disrupted the

205 complex by generating ChP-*Chd4* deficient mice. Cre was expressed in *Chd4* floxed mice (*Chd4*  
206 fl/fl) (Williams et al., 2004) using an adeno-associated viral vector (AAV) with tropism for the  
207 ChP (AAV2/5) (Haddad et al., 2013), delivered by *in utero* intracerebroventricular (ICV)  
208 injection at E14.5. *Chd4* transcript levels dropped to <50% by P7 (**Fig. 3D**). While CHD4  
209 protein levels only substantially decreased by P14 (**Fig. 3E, G**), we found that the developmental  
210 increase of ChP NKCC1 expression was disrupted as soon as the CHD4 protein decreased and  
211 lasted at least until P28 (**Fig. 3F, G**). Similar results were also observed in 4VChP (**Fig. 3H, I**).  
212 The expression of other developmentally regulated, functionally relevant candidates (*atp1a1*,  
213 *atp1b1*, and *klotho*) was not affected (data not shown). These data confirm that the NuRD/ChD4  
214 complex is one of the required components tightly regulating ChP NKCC1 developmental  
215 expression.

216

### 217 **ChP NKCC1 actively mediates CSF clearance during the early postnatal transition phase**

218 To test whether NKCC1 is indeed capable of transporting from CSF into the ChP during  
219 the period of rapid CSF [K<sup>+</sup>] decline, we induced NKCC1 overexpression (OE) in developing  
220 ChP epithelial cells using AAV2/5. NKCC1 transport directionality follows combined Na<sup>+</sup>, K<sup>+</sup>,  
221 Cl<sup>-</sup> gradients, which are close to being neutral in adult brains and likely to bias towards the CSF-  
222 to-ChP direction during the early postnatal phase. NKCC1 protein level would be rate-limiting  
223 during the early postnatal time when it is already highly phosphorylated, unlike in older mice  
224 where pNKCC1 only represented a small portion of total NKCC1. The goal of this OE approach  
225 was to accelerate endogenous ChP NKCC1 transport, thereby revealing its directionality based  
226 on whether CSF [K<sup>+</sup>] clearance was enhanced or delayed. AAV2/5-NKCC1, which expresses  
227 NKCC1 fused to an HA tag (Somasekharan et al., 2013), or control GFP virus was delivered by

228 *in utero* ICV at E14.5. Successful NKCC1 OE and increased pNKCC1 was confirmed in ChP at  
229 P0 (**Fig. 4A-D**). Appropriate localization to apical membranes of epithelial cells, transduction  
230 efficiency, and tissue specificity were also validated (**Fig. 4E-I, Supplementary Fig. 8 A, B**).  
231 Transcript levels of other K<sup>+</sup> transporters or channels did not change following AAV2/5-NKCC1  
232 transduction (**Supplementary Fig. 8C**). Because CSF [K<sup>+</sup>] sharply decreased from P0 to P7 (**Fig.**  
233 **1A**), we sampled CSF from ChP NKCC1 OE and control mice at P1. We found that ChP  
234 NKCC1 OE reduced CSF [K<sup>+</sup>] more than controls, with their P1 CSF [K<sup>+</sup>] values closely  
235 approximating those normally observed at P7 (**Fig. 4J**), indicating accelerated K<sup>+</sup> clearance from  
236 CSF after enhanced ChP NKCC1 activity. CSF total protein levels were not affected (AAV2/5-  
237 GFP = 2.50 ± 0.20 mg/ml vs. AAV2/5-NKCC1 = 2.71 ± 0.46 mg/ml; N = 6 from two litters each;  
238 *p* = 0.34, unpaired t-test). Overall, these findings support a model in which, under physiological  
239 conditions with high early postnatal CSF [K<sup>+</sup>], ChP NKCC1 transports K<sup>+</sup> out of CSF.

240 Next, we found that the circulating CSF volume in ChP NKCC1 OE mice was reduced,  
241 as reflected by smaller lateral ventricles. To avoid any tissue processing artifacts, we conducted  
242 live T2-weighted magnetic resonance imaging (MRI) (**Fig. 5A**) to quantify lateral ventricle  
243 volume. AAV-GFP mice were indistinguishable from naive wild-type mice at P14. In contrast,  
244 NKCC1 OE mice had reduced lateral ventricle volumes (**Fig. 5A, B**), without decrease in overall  
245 brain size (**Fig. 5C**), reflecting less circulating CSF. The difference in ventricle sizes from these  
246 same mice was sustained up to our final measurement at P50 (AAV-GFP: 3.12 ± 0.59 mm<sup>3</sup> vs.  
247 AAV-NKCC1: 1.28 ± 0.28 mm<sup>3</sup>, \* *p* = 0.0182). While the exact transport direction of NKCC1 in  
248 adult ChP is still under debate (Delpire and Gagnon, 2019), the consistency in ventricular  
249 volume from P14 into later life supports our working model that because a relatively small  
250 proportion of ChP NKCC1 was phosphorylated in mice P14 and older (**Fig. 2G**), NKCC1 levels

251 are not rate-limiting and thus OE would not as substantially impact ChP functions in older  
252 animals. Collectively, our findings demonstrate that ChP NKCC1 mediated CSF clearance  
253 during the first postnatal week. Augmenting this process impacted CSF volume homeostasis in  
254 the long term.

255 We then tested and found that enhancing CSF clearance through ChP NKCC1 OE  
256 changed how the brain and cranial space adapted to CSF volume changes. Intracranial  
257 compliance ( $C_i$ ) and CSF resistance ( $R_{CSF}$ ) describe the ability of the entire intracranial space  
258 (including brain, meninges, and outflow routes) to accommodate an increasing CSF volume that  
259 would otherwise increase intracranial pressure (ICP). In humans, these parameters are measured  
260 by a CSF constant rate infusion test (Aquilina et al., 2012, Eide, 2018, Lalou et al., 2018) and  
261 can aid in diagnosis and evaluation of conditions like hydrocephalus, which has decreased  $C_i$   
262 (Kahle et al., 2016). We developed a miniaturized version of this test to determine the  $C_i$  and  
263  $R_{CSF}$  in mice. The constant rate infusion test artificially increases CSF volume by ICV infusion  
264 of artificial CSF (aCSF), causing ICP to rise and plateau at a new level (**Fig. 5D, E**). The  $C_i$  and  
265  $R_{CSF}$  are estimated from the ICP vs. time curve using Marmarou's model of CSF dynamics  
266 (Czosnyka et al., 2012) (**Supplementary Fig. 9A**). Simply put, the  $C_i$  is proportional to the rate  
267 of ICP increase, and the  $R_{CSF}$  is related to the level of the post-infusion ICP plateau (**Fig. 5E**). As  
268 a quality control for the correct placement of infusion and measurement catheter, arterial and  
269 respiratory pulsations were clearly visible in the ICP waveform and their amplitude increased  
270 with volume load as expected (**Supplementary Fig. 9B, C**). Using this approach, we found that  
271 ChP NKCC1 OE significantly increased  $C_i$  at an age of 5-7 weeks (**Fig. 5F, G**), consistent with  
272 the brain having greater capacity for CSF in ventricles "deflated" due to excessive CSF clearance.  
273 Resting ICP and  $R_{CSF}$  were unchanged (**Fig. 5H, I**).

274

275 **Enhanced ChP NKCC1 function mitigates ventriculomegaly in a model of obstructive**  
276 **hydrocephalus**

277 Our findings of enhanced CSF clearance after ChP NKCC1 OE indicate that ChP  
278 NKCC1 can remove excess CSF. Therefore, we hypothesized that ChP NKCC1 OE expression  
279 could mitigate ventriculomegaly in a model of postnatal obstructive hydrocephalus. We first  
280 overexpressed ChP NKCC1 at E14.5 by in utero AAV2/5 ICV, then introduced obstructive  
281 hydrocephalus by a single unilateral injecting of kaolin into the lateral ventricle at P4 (Shaolin et  
282 al., 2015), and finally evaluated the lateral ventricle volumes by live T2 MRI at P14 (**Fig. 6A**).  
283 While both NKCC1 OE and control mice had enlarged ventricles at P14, NKCC1 OE mice had  
284 reduced ventriculomegaly compared to controls, with the average ventricle volume being less  
285 than 1/3 of the controls (**Fig. 6B-D**; ventricles marked by blue arrows; kaolin deposits marked by  
286 red arrows). Taken together, our findings demonstrate that early, ChP targeted NKCC1 OE has a  
287 sustained and broad impact on specific volumetric and biophysical parameters of the intracranial  
288 space with potential therapeutic applications to hydrocephalus.

289

290 **DISCUSSION**

291 In this study we sought to understand how CSF is cleared from the brain before the  
292 development of canonical CSF outflow routes (e.g. arachnoid granulations and meningeal  
293 lymphatics) (Antila et al., 2017, Munk et al., 2019). The intervening time period is a critical,  
294 transient phase in brain development when failure of CSF clearance has debilitating  
295 consequences (Volpe, 2008). Our results suggest that this period is defined by rapid decrease in  
296 CSF  $K^+$ . The ChP mediates the CSF  $K^+$  clearance during this transition period, and thus forms a  
297 CSF outflow route through ion and water co-transport by NKCC1 (**Fig. 7**). This CSF clearance  
298 by the ChP contrasts the prevailing models that ChP constantly, unidirectionally secretes CSF.  
299 Taken together, we discovered an unconventional, precisely timed, function of the developing  
300 ChP that clears CSF prior to the formation of other canonical routes, and provides targets for  
301 fluid management intervention during a critical transition phase of brain development.

302 NKCC1 is a bidirectional transporter, recently discovered to be an important co-  
303 transporter of water in the adult ChP (Steffensen et al., 2018). Although clearly established as a  
304 key molecular mechanism of CSF regulation, ChP NKCC1 transport direction and its  
305 determinants *in vivo* have been actively debated due to the technical challenges of 1) specifically  
306 manipulating ChP NKCC1 without affecting NKCC1 in other CSF-contacting cells, instead of  
307 ICV application of chemicals such as NKCC1 inhibitor bumetanide; and 2) accurately  
308 determining intracellular ion levels of ChP epithelial cells, and therefore ion gradients, under  
309 physiological conditions, as summarized in **Supplementary Table 1** and reviewed by Delpire  
310 and Gagnon (Delpire and Gagnon, 2019). Our *in vivo* “gain-of-function” approach effectively  
311 bypasses the abovementioned technical limitations. By overexpressing NKCC1 specifically in  
312 the ChP through AAV transduction to amplify its physiological functional impact, we could

313 subsequently observe the resulting CSF  $K^+$  and fluid volume changes to reveal the transporter's  
314 native directionality. Using this approach, we found that, in contrast to the common notion that  
315 the ChP constantly produces CSF, NKCC1 in the ChP mediated CSF clearance when CSF [ $K^+$ ]  
316 is above adult values, especially during the first postnatal week in mice. This phase corresponds  
317 to the third trimester to 6 months after birth in human, which represents a window of high  
318 vulnerability to congenial fluid disorders (Volpe, 2008).

319 We next demonstrated that the ChP clearance of CSF can be targeted to temper abnormal  
320 CSF accumulation. The ChP has been targeted for therapeutic manipulation in rodent models of  
321 neurologic diseases ranging from Huntington's disease and lysosomal storage disorders, to  
322 Alzheimer's disease, where transduction of exogenous gene products into ependymal or ChP  
323 epithelial cells has improved cardinal symptoms of disease (Kaler, 1994, Hudry et al., 2013).  
324 Encouragingly, we showed that enhancing ChP epithelial cell NKCC1 transport capacity  
325 lessened the severity of ventriculomegaly in a model of obstructive hydrocephalus. Our data  
326 demonstrate the possibility of tempering congenital hydrocephalus by augmenting endogenous  
327 ChP NKCC1 activity to increase CSF absorption rates during early development when CSF [ $K^+$ ]  
328 is high. In addition, because ChP CSF absorption via NKCC1 is driven by increased CSF [ $K^+$ ],  
329 this mechanism may come into play in other pathogenic conditions where CSF [ $K^+$ ] is transiently  
330 increased, such as after tissue injury or ventricular bleeding. Therefore, our findings emphasize  
331 the ChP as a targetable,  $K^+$ -sensitive and on-demand CSF drainage route in neurological  
332 disorders where CSF homeostasis is disrupted.

333 Further, in light of recent findings reporting hydrocephalus and ventriculomegaly in  
334 children with *de novo* loss-of-function CHD4 mutations (Weiss et al., 2020), we found that the  
335 CHD4/NuRD complex is required for the developmental regulation of NKCC1 expression. This

336 connection suggests a possible pathophysiological mechanism whereby lack of CHD4 activity  
337 might reduce NKCC1 levels during early development (equivalent to P0-P7 in mice), and lead to  
338 insufficient CSF clearance resulting in hydrocephalus. In our loxP-cre approach, most CHD4  
339 protein knockdown and resulting stagnation of NKCC1 expression occurred by P14, which is  
340 beyond the critical window of NKCC1 activity at P0-P7. As such, we did not model  
341 developmental ventriculomegaly with this approach. Improved genetic tools for early CHD4  
342 knockout and new animal models harboring the *de novo* patient mutations would be required to  
343 fully unravel the regulatory connection between CHD4/NuRD complex and NKCC1.

344 A key question that emerges from this work is: If the ChP is acting as an outflow  
345 pathway rather than a source of CSF during this transitional developmental phase – where does  
346 the early CSF water content come from? One mechanism that could be acting at this stage is CSF  
347 secretion by the developing brain tissue (e.g. progenitor cells that have a cell body at the  
348 ventricular zone but extend their basal processes to the developing pia) which secretes CSF  
349 immediately after neural tube closure (Gato et al., 2014). Future studies should elucidate whether  
350 this mechanism extends into this transitional phase. Consistent with progenitor involvement in  
351 CSF dynamics, recent identification of genes driving pediatric hydrocephalus shows affected  
352 genes to be expressed predominantly by cortical progenitor cells lining the brain's ventricles  
353 (Furey et al., 2018), and not the ChP, suggesting a non-choroidal source of CSF as an alternative  
354 contributor to abnormal CSF production.

355 In addition to fluid regulation, the newly identified ChP clearance route provides a key  
356 mechanism to regulate extracellular  $K^+$  during the first postnatal week. The subunits of the major  
357 system for moving  $K^+$  against its individual concentration gradient, the  $Na^+/K^+$ -ATPase (i.e.  
358 *Atp1a1* and *Atp1b1*), were not yet at their full expression levels during this period. The ChP



359 NKCC1-mediated  $K^+$  clearance mechanism might assist in establishing the  $K^+$  gradient in a  
360 timely manner, which is crucial for cellular physiology (Rasmussen et al., 2020). Notably, the  
361 period of rapidly decreasing CSF [ $K^+$ ] overlaps with the developmental phase when the  
362 excitatory-to-inhibitory “GABA switch” occurs. In early cortical progenitor cells that reside in  
363 the ventricular zone and are bathed by CSF, the classic inhibitory neurotransmitter GABA leads  
364 to excitatory potentials and suppression of DNA synthesis (LoTurco et al., 1995). As newborn  
365 cortical neurons differentiate and migrate away from the ventricular zone, GABA switches to  
366 adopt the more classic role as an inhibitory neurotransmitter by lowering intracellular  $Cl^-$  (Owens  
367 et al., 1999) which is achieved through coordinated activities of neuronal  $K^+/Cl^-$  co-transporters  
368 KCC2 and NKCC1 (Pisella et al., 2019, Watanabe et al., 2019). Because ions, including  $K^+$ , can  
369 traffic from CSF into interstitial fluid (Cserr, 1965, Fencel et al., 1966), any interference with the  
370 developmental timeline of ChP NKCC1 that resulted in delayed CSF  $K^+$  clearance could  
371 potentially increase extracellular/interstitial fluid [ $K^+$ ] and affect neural physiology (Rasmussen  
372 et al., 2020). Specifically, such a change in extracellular/interstitial fluid [ $K^+$ ] could  
373 fundamentally impact neuronal NKCC1 and KCC2 transport equilibrium, potentially  
374 contributing to a delayed GABA switch, a phenomenon reported in many models of  
375 neurodevelopmental and psychiatric disorders including subtypes of autism spectrum disorder  
376 (Amin et al., 2017), Rett syndrome (Banerjee et al., 2016), Fragile X syndrome (He et al., 2014),  
377 schizophrenia (Hyde et al., 2011), and Down syndrome (Deidda et al., 2015). Furthermore,  
378 extracellular [ $K^+$ ] and certain  $K^+$  channels also regulate activities of microglia (Madry et al.,  
379 2018), which are critical in synaptic pruning during postnatal neurodevelopment in mice  
380 (Schafer et al., 2012). Thus, the ChP is poised to play important roles in proper CNS formation  
381 by creating and maintaining desirable extracellular ionic homeostasis at different developmental

382 stages, with subsequent effects on neuronal maturation, circuit formation, and  
383 neuroinflammatory homeostasis.

384       Beyond key findings and implications during this critical transitional developmental stage,  
385 our study introduced a murine ICP measurement device combined with constant CSF infusion.  
386 This approach provides a much-needed advance in fluid research technology that can be broadly  
387 applied to study essentially all CSF dynamic systems across the mouse lifespan. We adapted our  
388 tool from clinical practice to provide a range of options for measuring global cerebral fluid states  
389 that reflect the interaction between CSF and cranial tissues. In later life, CSF homeostasis is  
390 maintained by collaborative efforts from multiple players in the brain, including the ChP, the  
391 dural lymphatics (Antila et al., 2017), glymphatics (Munk et al., 2019), leptomeningeal  
392 vasculature (Li et al., 2020), and the ependyma (Spassky et al., 2005). While this approach  
393 measures overall cranial fluid dynamics as one single unit, future applications could apply  
394 mathematical models that have been proposed to isolate the contribution of distinct CSF outflow  
395 routes using data acquired from human patients (Vinje et al., 2020). Such adaptability secures the  
396 broadening relevance of our tool and inspires optimism for further improved resolution in  
397 studying brain fluid dynamics. Availability of this new tool also allows future researchers to  
398 obtain measurements in support of the growing comprehensive “systems” view of regulatory  
399 mechanisms of CSF-brain interactions.

400       In summary, our study presents a critical transient phase when the ChP acts as a non-  
401 canonical route for CSF clearance prior to the maturation of other canonical clearance pathways.  
402 ChP NKCC1 mediates CSF clearance in a  $K^+$ -dependent manner. Targeting this absorption route  
403 holds promise in improving fluid management for congenital hydrocephalus and other CSF  
404 disorders.

405 **ACKNOWLEDGEMENTS**

406 We thank members of the Lehtinen, Heiman, and Warf labs for helpful discussions;  
407 Nancy Chamberlin for critical reading of the manuscript; Katia Georgopoulos for sharing the  
408 *Chd4* fl/fl mouse line and associated genotyping methods; P. Ellen Grant for the ICP monitor.  
409 We thank the following facility and personnel: Maria Ericsson and HMS EM facility; Yaotang  
410 Wu and Michael Marcotrigiano and BCH Small Animal Imaging Laboratory; the MIT BioMicro  
411 Center (TRAP sequencing); BCH viral core and University of Pennsylvania Vector Core.

412 Funding: NIH T32 HL110852 (RMF and JC); William Randolph Hearst Fund (JC); NSF  
413 Graduate Research Fellowship Program (FBS); OFD/BTREC/CTREC Faculty Development  
414 Fellowship Award (RMF); Simons Foundation Autism Research Awards (IDs 590293 and  
415 645596 for CN and DS, respectively). NIH R01 AI130591 and R35 HL145242 (MJH); NIH R00  
416 HD083512 (P-YL) and R01 HD096693 (P-YL & BCW); BCH Pilot Grant, Pediatric  
417 Hydrocephalus Foundation, Hydrocephalus Association, Human Frontier Science Program  
418 (HFSP) research program grant #RGP0063/2018, NIH R01 NS088566, the New York Stem Cell  
419 Foundation (MKL); and BCH IDDRC 1U54HD090255. M.K. Lehtinen is a New York Stem Cell  
420 Foundation – Robertson Investigator.

421  
422 **Author contributions:** H.X., R.M.F., C.S. J.S., P.-Y. L., B.C.W., F.B.S., J.C., D.S., C.N., and  
423 M.K.L. designed and performed experiments; H.X., R.M.F., C.S., and J.S. analyzed the data;  
424 Y.Z. and M.J.H. provided material; A.V., F.G., and M.H. provided technological support; H.X.,  
425 R.M.F., and M.K.L. wrote the manuscript. All co-authors edited the manuscript.

426

427 **Declaration of interests:** The authors declare that no competing interests exist.

428 **METHODS**

429 Mice

430 The Boston Children's Hospital IACUC approved all experiments involving mice in this  
431 study. Timed pregnant CD1 dams were obtained from Charles River Laboratories. Mice with  
432 germline loxP-CHD4-loxP were imported from MGH and bred in-house. Both male and female  
433 mice were equally included in the study and were analyzed at postnatal day 0, 7, 14, 21, 28, 5-  
434 7weeks, and 2+ months. Animals were housed in a temperature-controlled room on a 12-hr  
435 light/12-hr dark cycle and had free access to food and water. For studies involving mice younger  
436 than postnatal day 10, all mice were allocated into groups based solely on the gestational age  
437 without respect to sex (both males and females were included). For studies involving mice older  
438 than 10 days, both male and female are included intentionally.

439 CSF Collection and Metal Detection

440 CSF was collected by from cisterna magna using a glass capillary, and collected CSF was  
441 centrifuged at 10,000xg for 10min at 4°C to remove any tissue debris. Metal quantifications were  
442 performed by Galbraith Laboratories, Inc. (Knoxville, TN, USA). Inductively coupled plasma -  
443 optical emission spectrometry (ICP-OES) was used for K and Na quantification, and ion  
444 chromatography (IC) was used for the Cl<sup>-</sup> quantification. All tests were performed using 5-7μL  
445 of CSF.

446 TRAP

447 Mice aged 8 weeks or E16.5 from the *Foxj1:Cre* x EGFP-L10a Bacterial Artificial  
448 Chromosome (BAC) transgenic lines (N=3, each N included LVChP pooled from 3 mice) were  
449 used and brain tissue was immediately dissected and used for TRAP RNA purifications as

450 previously described (Heiman et al., 2008). RNA quality was assessed using Bioanalyzer Pico  
451 Chips (Agilent, 5067-1513) and quantified using Quant-iT RiboGreen RNA assay kit (Thermo  
452 Fisher Scientific R11490). Libraries were prepared using Clontech SMARTer Pico with  
453 ribodepletion and Illumina HiSeq to 50NT single end reads. Sequencing was performed at the  
454 MIT BioMicroCenter.

#### 455 Sequencing Data Analysis

456 The raw fastq data of 50-bp single-end sequencing reads were aligned to the mouse  
457 mm10 reference genome using STAR 2.4.0 RNA-Seq aligner (Dobin et al., 2013). The mapped  
458 reads were processed by htseq-count of HTSeq software (Anders et al., 2015) with mm10 gene  
459 annotation to count the number of reads mapped to each gene. The Cuffquant module of the  
460 Cufflinks software (Trapnell et al., 2010) was used to calculate gene FPKM (Fragments Per  
461 Kilobase of transcript per Million mapped reads) values. Gene differential expression test  
462 between different animal groups was performed using DESeq2 package (Love et al., 2014)  
463 with the assumption of negative binomial distribution for RNA-Seq data. Genes with adjusted p-  
464 value < 0.05 are chosen as differentially expressed genes. All analyses were performed using  
465 genes with FPKM > 1, which we considered as the threshold of expression (Figure 2- source  
466 data).

#### 467 Sequencing Pathway and Motif Analysis

468 Functional annotation clustering was performed using DAVID v6.7 (Huang da et al.,  
469 2009). Gene ontology (GO) analysis was performed using AdvaitaBio iPathway guide V.v1702.  
470 Enrichment vs. perturbation analysis was performed by AdvaitaBio iPathway guide V.v1702 and  
471 allows comparison of pathway output perturbation and cumulative gene set expression changes.  
472 In brief, the enrichment analysis is a straightforward gene-set enrichment over representation

473 analysis (ORA) considering the number of differentially expressed genes (DEGs) that are  
474 assigned to a given pathway. The enrichment value is expressed as a proportion of enriched  
475 members to total genes in a defined pathway and a p-value (Fisher) is calculated for this score,  
476 however false positives have been reported at up to 10% with this method (Draghici et al., 2007).  
477 Perturbation, on the other hand, uses pathway data that applies relationships between gene  
478 products rather than only using a list. Perturbation assigns an impact score based on a  
479 mathematical model that captures the entire topology of the pathway and uses it to calculate how  
480 changes in the expression of each gene in the pathway would perturb the absolute output of the  
481 pathway (Draghici et al., 2007). Then, these gene perturbations are combined into a total  
482 perturbation for the entire pathway and a p-value is calculated by comparing the observed value  
483 with what is expected by chance. Motif analyses were performed using SignalP (v5.0; Almagro  
484 Armenteros et al., 2019) and TMHMM (v2.0; Sonnhammer et al., 1998).

#### 485 Transmission Electron Microscopy

486 All tissue processing, sectioning, and imaging was carried out at the Conventional  
487 Electron Microscopy Facility at Harvard Medical School. Forebrain tissues were fixed in 2.5%  
488 Glutaraldehyde/2% Paraformaldehyde in 0.1 M sodium cacodylate buffer (pH 7.4). They were  
489 then washed in 0.1M cacodylate buffer and postfixed with 1% Osmiumtetroxide (OsO<sub>4</sub>)/1.5%  
490 Potassiumferrocyanide (K<sub>4</sub>Fe(CN)<sub>6</sub>) for one hour, washed in water three times and incubated in 1%  
491 aqueous uranyl acetate for one hour. This was followed by two washes in water and subsequent  
492 dehydration in grades of alcohol (10 minutes each; 50%, 70%, 90%, 2x10min 100%). Samples  
493 were then incubated in propyleneoxide for one hour and infiltrated overnight in a 1:1 mixture of  
494 propyleneoxide and TAAB Epon (Marivac Canada Inc. St. Laurent, Canada). The following day,  
495 the samples were embedded in TAAB Epon and polymerized at 60 degrees C for 48 hours.

496 Ultrathin sections (about 80nm) were cut on a Reichert Ultracut-S microtome, and picked up  
497 onto copper grids stained with lead citrate. Sections were examined in a JEOL 1200EX  
498 Transmission electron microscope or a TecnaiG<sup>2</sup> Spirit BioTWIN. Images were recorded with an  
499 AMT 2k CCD camera.

#### 500 Glycogen and Mitochondrial Quantification

501 Glycogen and mitochondrial quantification was performed by hand using the ImageJ  
502 plugin FIJI (Schindelin et al., 2012, Schneider et al., 2012). Percentages were calculated by  
503 dividing the area of interest by the total area of ChP epithelial cell within the field of view. No  
504 other cell types were included in the analysis. For each condition, analyses were performed  
505 across multiple individual animals (N=3 for each age). From each animal, 10-20 fields of view  
506 were imaged at 3,000x for glycogen analysis and 5-10 fields of view were imaged at 3,000x for  
507 mitochondrial analysis. Each different field of view represented a unique cell or cells, and fields  
508 of view were chosen such that both the apical and basal surfaces of the cell were visible. For  
509 mitochondrial distribution, a custom MatLab (v.2018) code was written to extract the centroid  
510 from mitochondria data traced in ImageJ ROIs (Supplementary file). Then a distance  
511 transformation was performed from each mitochondrion centroid to the hand-traced apical or  
512 basal surfaces. The shortest distance was extracted to calculate the apical: basal proximity ratio,  
513 such that 1= on the apical surface and 0= on the basal surface. The analyses included a total of  
514 1747 adult mitochondria, 2241 P7 mitochondria, 2257 P0 mitochondria, and 1123 embryonic  
515 mitochondria.

#### 516 Seahorse Metabolic Analysis

517 ChP explants were dissected in HBSS (Fisher, SH30031FS) and maintained on wet ice

518 until plated. Only the posterior leaflet of the P0, P7, and adult ChP was retained for analysis due  
519 to empirically determined limitations of the oxygen availability in the XFe96 Agilent Seahorse  
520 system. Tissue explants were plated on Seahorse XFe96 spheroid microplates (Agilent, 102905-  
521 100) coated with Cell TAK (Corning), in Seahorse XF Base Medium (Agilent, 102353-100)  
522 supplemented with 0.18% glucose, 1mM L-glutamine, and 1mM pyruvate at pH7.4 and  
523 incubated for 1 hour at 37 °C in a non-CO<sub>2</sub> incubator. Extracellular acidification rates (ECAR)  
524 and oxygen consumption rates (OCR) were measured via the Cell Mito Stress Test (Agilent,  
525 103015-100) with a Seahorse XFe96Analyzer (Agilent) following the manufacturer's protocols.  
526 Data were processed using Wave software (Agilent). ATP production was calculated as the  
527 difference in OCR measurements before and after oligomycin injection, as described by the  
528 manufacturer's protocol (Agilent, 103015-100). The Cell Mito Stress test was performed 2-5  
529 independent times. The individual analyses were performed by averaging the readings from both  
530 the right and left hemisphere lateral ventricle ChP for each individual. Data were normalized by  
531 Calcein-AM (2μM in PBS, Life Technologies L-3224) fluorescence measured at the end of the  
532 assay. Data are presented normalized to the adult levels for each assay to account for any  
533 experimental variability.

#### 534 High K<sup>+</sup> challenge study

535 Fresh LV ChPs were collected from P4 pups and adult mice in room temperature HBSS  
536 and glued down onto imaging dishes with coverslip bottom. The tissues were incubated at 37 °C  
537 with Calcein-AM (Invitrogen L3224; 1:200) for 10min and then rinsed with 37 °C artificial CSF  
538 (aCSF: 119 mM NaCl, 2.5 mM KCl, 26 mM NaHCO<sub>3</sub>, 1 mM NaH<sub>2</sub>PO<sub>4</sub>, 11 mM glucose, with  
539 fresh 2.0 mM magnesium chloride and 2.8 mM calcium chloride). The tissues were soaked in  
540 1.8ml aCSF at the beginning of each imaging session and allowed to stabilize for 10min. One Z-



541 stack was acquired to reflect the baseline cell volume. Then a 10x KCl solution in aCSF was  
542 spiked into the bath to make the final bath  $K^+$  concentration 50mM immediately before imaging  
543 subsequent continued. A total of five 3D Z-stacks were acquired throughout a 10-min imaging  
544 session to capture changes in cellular volume over time. Each stack took less than 30s to  
545 minimize changes in cell volume from the beginning to the end of each stack. All imaging  
546 studies were carried out at 37°C. Image stacks were imported into Imaris (Bitplane) software.  
547 Individual epithelial cells were identified by shape. Cells with discrete borders that were present  
548 at all timepoints and had dark pixels both above and below them in Z for the whole timecourse  
549 were selected *a priori* and then traced by hand using the “Surpass” functionality to create a 3D  
550 surface volume through all Z stacks based on Calcein-AM uptake signal. Due to known z-step  
551 distance and interpolation between the planes, Imaris calculated the number of voxels for each  
552 cell. This analysis was then repeated for the same cell throughout the timecourse. We verified  
553 manually that the cell was the same individual based on the topology of the surrounding cells,  
554 allowing for adjustment for any x-y drifting that occurred. The relative volume was calculated as  
555  $dV/V_0$  for each timepoint (t) where  $V_0$  is the initial volume of the cell, t is each subsequent  
556 timepoint after addition of challenge, and  $dV = V_t - V_0$ .

### 557 Tissue processing

558 Samples were fixed in 4% paraformaldehyde (PFA). For cryosectioning, samples were  
559 incubated in the following series of solutions: 10% sucrose, 20% sucrose, 30% sucrose, 1:1  
560 mixture of 30% sucrose and OCT (overnight), and OCT (1 hour). Samples were frozen in OCT.

### 561 Immunostaining

562 Cryosections were blocked and permeabilized (0.3% Triton-X-100 in PBS; 5% serum),  
563 incubated in primary antibodies overnight and secondary antibodies for 2 hours. Sections were

564 counterstained with Hoechst 33342 (Invitrogen H3570, 1:10000) and mounted using  
565 Fluoromount-G (SouthernBiotech). The following primary antibodies were used: chicken anti-  
566 GFP (Abcam ab13970; 1:1000), mouse anti-Aqp1 (Santa Cruz sc-32737; 1:100), rabbit anti-  
567 CHD4 (Abcam ab72418, 1:200), rabbit anti-NKCC1 (Abcam ab59791; 1:500), rat anti-HA  
568 (Roche 11867423001; 1:1000). Secondary antibodies were selected from the Alexa series  
569 (Invitrogen, 1:500). Images were acquired using Zeiss LSM880 confocal microscope with 20x  
570 objective.

### 571 Co-IP

572 Tissues were homogenized in NET buffer (150mM NaCl, 10mM Tris 8.0, 5mM EDTA,  
573 10% glycerol and 2% Triton-100) supplemented with protease inhibitors. Protein concentration  
574 was determined by BCA assay (Thermo Scientific 23227). Lysates with same amount of total  
575 protein (250-1000 $\mu$ g based on experiments) were pre-cleared at 4° C for 2hr with Protein G  
576 agarose and then incubated with desired antibody or control antibody at 4° C overnight (no beads  
577 present during antibody incubation). Protein G agarose beads were added to lysate-antibody  
578 mixture after overnight incubation for 2hr. Beads were washed thoroughly and then eluted by  
579 boiling in 2% SDS. ChP tissues were pooled across 7 litters of P0 pups and 30 adults to achieve  
580 sufficient protein for Co-IP.

### 581 Immunoblotting

582 Tissues were homogenized in RIPA buffer supplemented with protease and phosphatase  
583 inhibitors. Protein concentration was determined by BCA assay (Thermo Scientific 23227).  
584 Samples were denatured in 2% SDS with 2-mercaptoethanol by heating at 37°C (for NKCC1) or  
585 95°C (for CHD4 and other NuRD complex proteins) for 5 minutes. Equal amounts of proteins  
586 were loaded and separated by electrophoresis in a 4-15% gradient polyacrylamide gel (BioRad

587 #1653320) or NuPAGE 4-12% Bis-Tris gel (Invitrogen #NP0322), transferred to a nitrocellulose  
588 membrane (250mA, 1.5 hours, on ice), blocked in filtered 5% BSA or milk in TBST, incubated  
589 with primary antibodies overnight at 4°C followed by HRP conjugated secondary antibodies  
590 (1:5000) for 1 hour, and visualized with ECL substrate. For phosphorylated protein analysis, the  
591 phospho-proteins were probed first, and then blots were stripped (Thermo Scientific 21059) and  
592 reprobed for total proteins. For co-IP protein analysis, TrueBlot secondary antibody (eBioscience  
593 18-8816-33) was used to detect only non-denatured IgG and avoid background signal from IP  
594 antibody. The following primary antibodies were used: rabbit anti-NKCC1 (Abcam ab59791;  
595 1:1000), rabbit anti-pNKCC1 (EMD Millipore ABS1004; 1:1000), rabbit anti-ATP1a1 (Upstate  
596 C464.6/05-369; 1:250, goat-anti-klotho (R&D AF1819-sp; 1:200), rabbit anti-GAPDH (Sigma  
597 G9545; 1:10000), mouse anti-HA (Abcam ab130275; 1:1000), rabbit anti-CHD4 (Abcam  
598 ab72418; 1:2000), rabbit anti-MBD3 (Abcam ab157464; 1:1000), rabbit anti-HDAC1 (Abcam  
599 ab7028; 1:2000), mouse anti-HDAC2 (Abcam 51832; 1:2000).

#### 600 Quantitative RT-PCR

601 For mRNA expression analyses, the ChP were collected and pooled from 2 pups. RNA  
602 was isolated using the MirVana miRNA isolation kit (Invitrogen AM1561) following  
603 manufacturer's specifications without miRNA enrichment step. Extracted RNA was quantified  
604 spectrophotometrically and 100ng was reverse-transcribed into cDNA using the High Capacity  
605 cDNA Reverse Transcription kit (Applied Biosystems #4368814) following manufacturer's  
606 specifications. RT-qPCRs were performed in duplicate using Taqman Gene Expression Assays  
607 and Taqman Gene Expression Master Mix (Applied Biosystems) with GAPDH as an internal  
608 control. Cycling was executed using the StepOnePlus Real-Time PCR System (Invitrogen) and  
609 analysis of relative gene expression was performed using the  $2^{-\Delta\Delta CT}$  method. Technical replicates

610 were averaged for their cycling thresholds and further calculations were performed with those  
611 means.

#### 612 *In utero* intracerebroventricular injection (ICV)

613 Timed pregnant mice (E14.5) were deeply anesthetized by isoflurane and placed on warm  
614 pads. Laparotomy was performed and AAV solution was delivered into the lateral ventricle of  
615 each embryo using glass capillary pipettes. The abdominal incision was then sutured. Meloxicam  
616 analgesia was longitudinally delivered according to IACUC protocol.

#### 617 Intraventricular kaolin injection in postnatal pups

618 Postnatal day 4 pups (P4) were deeply anesthetized by hypothermia. 1 $\mu$ l of sterile kaolin  
619 solution (25% in PBS) was delivered into the left lateral ventricle using glass capillary pipettes.  
620 The lateral ventricle location was determined as in between bregma and lambda, and 1mm from  
621 mid-line. The pups were then warmed and returned to the dam.

#### 622 AAV production

623 The original AAV-NKCC1 plasmid was purchased from Addgene (pcDNA3.1 HA CFP  
624 hNKCC1 WT (NT15-H) was a gift from Biff Forbush: Addgene plasmid # 49077;  
625 <http://n2t.net/addgene:49077>; RRID:Addgene\_49077). The plasmid carries an 3xHA tag at the  
626 N-terminal of NKCC1 to allow detection and separation from endogenous NKCC1. The CFP tag  
627 was removed by BsaI digestion to reduce insert size for AAV production. Virus production and  
628 purification were performed by the Penn Vector Core. Due to the very large size of the plasmid  
629 we experienced variable infection efficiency. All mice receiving AAV-NKCC1 were analyzed  
630 for HA expression after every experiment to confirm infection efficiency. AAV-GFP and AAV-  
631 Cre were purchased from BCH viral core at Boston Children's Hospital.

632 Magnetic resonance imaging (MRI)

633 Mice were imaged using Bruker BioSpec small animal MRI (7T) at 2wk and P50 while  
634 under anesthesia by isoflurane. A warm pad was used to maintain body temperature. Breathing  
635 rate and heart rate were monitored to reflect the depth of anesthesia. All axial T2 images were  
636 acquired using the following criteria: TE/TR=60/4000; Ave=8; RARE=4; slice thickness=0.6mm.  
637 Ventricle volumes were calculated by manual segmentation using FIJI/ImageJ. In studies with  
638 unilateral kaolin injection, 3D reconstruction of the ventricles was performed by manual  
639 segmentation in ITK-SNAP (Madan, 2015) and exported through ParaView.

640 Constant rate CSF infusion test (ICP and compliance measurement)

641 An apparatus was developed to perform a constant infusion test in mice through a single  
642 catheter for both infusion of CSF and monitoring of ICP. A 20cc syringe was filled with aCSF  
643 and placed in an automated infusion pump (GenieTouch, Kent Scientific Co., Denver) and set to  
644 deliver a constant rate infusion of 1-4  $\mu$ L/minute. The syringe was connected via pressure tubing  
645 to hemostasis valve Y connector (Qosina, NY). A fiberoptic ICP sensor (Fiso Technologies Inc,  
646 Québec, Canada) was inserted through the other port of the rotating hemostat and then into 0.55  
647 mm diameter catheter until the sensor was flush with the catheter's distal tip. The entire  
648 apparatus and tubing was carefully screened to ensure the absence of air bubbles. Adult mice  
649 were then deeply anesthetized, placed on a warm pad, and head-fixed with ear bars. The distal  
650 end of the infusion device (catheter with fiberoptic sensor) was placed inside lateral ventricle (-  
651 0.4mm (anterior-posterior) and 1.2mm (medial-lateral) with respect to Bregma, and a depth of 2  
652 mm from the outer edge of the skull); the catheter was then sealed with Vetbond (3M,  
653 Minnesota). Intraventricular access and water-tight seal was confirmed by observation of arterial  
654 and respiratory waveforms in the ICP signal and a transient rise in ICP upon gentle compression

655 of the abdomen and thorax. Two minutes of baseline ICP were recorded before initiating the  
656 infusion of aCSF. As the infusion proceeded, careful observation was made of the mouse's  
657 respiratory rate. After the ICP level reached a new plateau, the infusion was discontinued. The  
658 procedure was terminal. Parameters of the Marmarou model of CSF dynamics for constant rate  
659 infusions were estimated by a non-linear least squares fit of the model to the ICP data (Czosnyka  
660 et al., 2012)

$$ICP(t) = \frac{\left[ i_{infusion} + \frac{ICP_{baseline} - p_0}{R_{CSF}} \right] \cdot [ICP_{baseline} - p_0]}{\frac{ICP_{baseline} - p_0}{R_{CSF}} + i_{infusion} \cdot \left[ e^{-\frac{\left[ i_{infusion} + \frac{ICP_{baseline} - p_0}{R_{CSF}} \right] \cdot t}{C_i}} \right]}$$

661 where  $i_{infusion}$  is the rate of infusion,  $ICP_{baseline}$  is the ICP level before infusion,  $p_0$  is a pressure in  
662 the storage arm of the model,  $R_{CSF}$  is the resistance to CSF outflow, and  $C_i$  is the compliance  
663 coefficient.

## 664 QUANTIFICATION AND STATISTICAL ANALYSIS

665 Biological replicates (N) were defined as samples from distinct individual animals,  
666 analyzed either in the same experiment or within multiple experiments, with the exception when  
667 individual animal could not provide sufficient sample (i.e. CSF), in which case multiple animals  
668 were pooled into one biological replicate and the details are stated in the corresponding figure  
669 legends. Statistical analyses were performed using Prism 7 or R. Outliers were excluded using  
670 ROUT method (Q = 1%). Appropriate statistical tests were selected based on the distribution of  
671 data, homogeneity of variances, and sample size. The majority of the analyses were done using  
672 One-way ANOVA with multiple comparison correction (Sidak) or Welch's unpaired t-test,  
673 except for Fig. 1E-G, and Fig. 1I-J where the analysis was done by Welch's ANOVA with  
674 Dunnett's T3 multiple comparison test, and Fig. 1L where the analysis was done using

675 Kolmogorov-Smirnov test. F tests or Bartlett's tests were used to assess homogeneity of  
676 variances between data sets. Parametric tests (t-test, ANOVA) were used only if data were  
677 normally distributed and variances were approximately equal. Otherwise, nonparametric  
678 alternatives were chosen. Data are presented as means  $\pm$  standard deviation (SD). If multiple  
679 measurements were taken from a single individual, data are presented as means  $\pm$  standard errors  
680 of the mean (SEMs). Please refer to figure legends for sample size.  $p$  values  $< 0.05$  were  
681 considered significant (\*  $p < 0.05$ , \*\*  $p < 0.01$ , \*\*\*  $p < 0.001$ , \*\*\*\*  $p < 0.0001$ ). Exact  $p$  values  
682 can be found in the figure legends.  $P$  values are also marked in the figures where space allows.  
683

684 **REFERENCES:**

- 685 Almagro Armenteros JJ, Tsirigos KD, Sonderby CK, Petersen TN, Winther O, Brunak S, von  
686 Heijne G, Nielsen H (2019) SignalP 5.0 improves signal peptide predictions using deep  
687 neural networks. *Nature biotechnology* 37:420-423.
- 688 Amin H, Marinaro F, De Pietri Tonelli D, Berdondini L (2017) Developmental excitatory-to-  
689 inhibitory GABA-polarity switch is disrupted in 22q11.2 deletion syndrome: a potential  
690 target for clinical therapeutics. *Scientific reports* 7:15752.
- 691 Anders S, Pyl PT, Huber W (2015) HTSeq--a Python framework to work with high-throughput  
692 sequencing data. *Bioinformatics* 31:166-169.
- 693 Antila S, Karaman S, Nurmi H, Airavaara M, Voutilainen MH, Mathivet T, Chilov D, Li Z,  
694 Koppinen T, Park JH, Fang S, Aspelund A, Saarma M, Eichmann A, Thomas JL, Alitalo  
695 K (2017) Development and plasticity of meningeal lymphatic vessels. *The Journal of*  
696 *experimental medicine* 214:3645-3667.
- 697 Aquilina K, Pople IK, Sacree J, Carter MR, Edwards RJ (2012) The constant flow ventricular  
698 infusion test: a simple and useful study in the diagnosis of third ventriculostomy failure.  
699 *Journal of neurosurgery* 116:445-452.
- 700 Banerjee A, Rikhye RV, Breton-Provencher V, Tang X, Li C, Li K, Runyan CA, Fu Z, Jaenisch  
701 R, Sur M (2016) Jointly reduced inhibition and excitation underlies circuit-wide changes  
702 in cortical processing in Rett syndrome. *Proceedings of the National Academy of*  
703 *Sciences of the United States of America* 113:E7287-E7296.
- 704 Bhargava P, Schnellmann RG (2017) Mitochondrial energetics in the kidney. *Nature reviews*  
705 *Nephrology* 13:629-646.
- 706 Cserr H (1965) Potassium exchange between cerebrospinal fluid, plasma, and brain. *The*  
707 *American journal of physiology* 209:1219-1226.
- 708 Czosnyka M, Czosnyka Z, Agarwal-Harding KJ, Pickard JD (2012) Modeling of CSF dynamics:  
709 legacy of Professor Anthony Marmarou. *Acta neurochirurgica Supplement* 113:9-14.
- 710 Danker-Hopfe F, Brown PD, Praetorius J (2013) Cerebrospinal fluid secretion by the choroid plexus.  
711 *Physiological reviews* 93:1847-1892.
- 712 Darman RB, Forbush B (2002) A regulatory locus of phosphorylation in the N terminus of the  
713 Na-K-Cl cotransporter, NKCC1. *The Journal of biological chemistry* 277:37542-37550.
- 714 Deidda G, Parrini M, Naskar S, Bozarth IF, Contestabile A, Cancedda L (2015) Reversing  
715 excitatory GABAAR signaling restores synaptic plasticity and memory in a mouse model  
716 of Down syndrome. *Nature medicine* 21:318-326.
- 717 Delpire E, Gagnon KB (2019) Elusive role of the Na-K-2Cl cotransporter in the choroid plexus.  
718 *American journal of physiology Cell physiology* 316:C522-C524.
- 719 Dobin A, Davis CA, Schlesinger F, Drenkow J, Zaleski C, Jha S, Batut P, Chaisson M, Gingeras  
720 TR (2013) STAR: ultrafast universal RNA-seq aligner. *Bioinformatics* 29:15-21.
- 721 Draghici S, Khatir P, Tarca AL, Amin K, Done A, Voichita C, Georgescu C, Romero R (2007) A  
722 systems biology approach for pathway level analysis. *Genome research* 17:1537-1545.



- 723 Eide PK (2018) The pathophysiology of chronic noncommunicating hydrocephalus: lessons from  
724 continuous intracranial pressure monitoring and ventricular infusion testing. *Journal of*  
725 *neurosurgery* 129:220-233.
- 726 Fame RM, Lehtinen MK (2020) Emergence and Developmental Roles of the Cerebrospinal Fluid  
727 System. *Developmental Cell* 52:261-275.
- 728 Fencel V, Miller TB, Pappenheimer JR (1966) Studies on the respiratory response to disturbances  
729 of acid-base balance, with deductions concerning the ionic composition of cerebral  
730 interstitial fluid. *The American journal of physiology* 210:459-472.
- 731 Furey CG, Choi J, Jin SC, Zeng X, Timberlake AT, Nelson-Williams C, Mansuri MS, Lu Q,  
732 Duran D, Panchagnula S, Allocco A, Karimy JK, Khanna A, Gaillard JR, DeSpensa T,  
733 Antwi P, Loring E, Butler WE, Smith ER, Warf BC, Strahle JM, Limbrick DD, Storm PB,  
734 Heuer G, Jackson EM, Iskandar BJ, Johnston JM, Tikhonova I, Castaldi C, Lopez-  
735 Giraldez F, Bjornson RD, Knight JR, Bilguvar K, Mane S, Alper SL, Haider S, Guclu B,  
736 Bayri Y, Sahin Y, Apuzzo MLJ, Duncan CC, DiLuna ML, Gunel M, Lifton RP, Kahle  
737 KT (2018) De Novo Mutation in Genes Regulating Neural Stem Cell Fate in Human  
738 Congenital Hydrocephalus. *Neuron* 99:302-314 e304.
- 739 Gato A, Alonso MI, Martin C, Carnicero E, Moro JA, De la Mano A, Fernandez JM, Lamus F,  
740 Desmond ME (2014) Embryonic cerebrospinal fluid in brain development: neural  
741 progenitor control. *Croatian medical journal* 55:299-305.
- 742 Gilmore JH, Kang C, Evans DD, Wolfe HM, Smith JK, Lieberman JA, Lin W, Hamer RM,  
743 Styner M, Gerig G (2010) Prenatal and neonatal brain structure and white matter  
744 maturation in children at high risk for schizophrenia. *The American journal of psychiatry*  
745 167:1083-1091.
- 746 Goodman JV, Bonni A (2019) Regulation of neuronal connectivity in the mammalian brain by  
747 chromatin remodeling. *Current opinion in neurobiology* 59:59-68.
- 748 Haddad MR, Donsante A, Zerfas P, Kaler SG (2013) Fetal Brain-directed AAV Gene Therapy  
749 Results in Rapid, Robust, and Persistent Transduction of Mouse Choroid Plexus Epithelia.  
750 *Molecular therapy Nucleic acids* 2:e101.
- 751 Hamann S, Herrera-Perez JJ, Zeuthen T, Alvarez-Leefmans FJ (2010) Cotransport of water by  
752 the Na<sup>+</sup>-K<sup>+</sup>-2Cl<sup>-</sup> cotransporter NKCC1 in mammalian epithelial cells. *The Journal of*  
753 *physiology* 588:4089-4101.
- 754 He Q, Nomura T, Xu J, Contractor A (2014) The developmental switch in GABA polarity is  
755 delayed in fragile X mice. *The Journal of neuroscience : the official journal of the*  
756 *Society for Neuroscience* 34:446-450.
- 757 Heiman M, Schaefer A, Gong S, Peterson JD, Day M, Ramsey KE, Suarez-Farinas M, Schwarz  
758 C, Stephan DA, Surmeier DJ, Greengard P, Heintz N (2008) A translational profiling  
759 approach for the molecular characterization of CNS cell types. *Cell* 135:738-748.
- 760 Huang da W, Sherman BT, Lempicki RA (2009) Systematic and integrative analysis of large  
761 gene lists using DAVID bioinformatics resources. *Nature protocols* 4:44-57.
- 762 Hudry E, Dashkoff J, Roe AD, Takeda S, Koffie RM, Hashimoto T, Scheel M, Spires-Jones T,  
763 Arbel-Ornath M, Betensky R, Davidson BL, Hyman BT (2013) Gene transfer of human

- 764 Apoe isoforms results in differential modulation of amyloid deposition and neurotoxicity  
765 in mouse brain. *Science translational medicine* 5:212ra161.
- 766 Hyde TM, Lipska BK, Ali T, Mathew SV, Law AJ, Metitiri OE, Straub RE, Ye T, Colantuoni C,  
767 Herman MM, Bigelow LB, Weinberger DR, Kleinman JE (2011) Expression of GABA  
768 signaling molecules KCC2, NKCC1, and GAD1 in cortical development and  
769 schizophrenia. *The Journal of neuroscience : the official journal of the Society for*  
770 *Neuroscience* 31:11088-11095.
- 771 Kahle KT, Kulkarni AV, Limbrick DD, Jr., Warf BC (2016) Hydrocephalus in children. *Lancet*  
772 387:788-799.
- 773 Kaler SG (1994) Menkes disease. *Advances in pediatrics* 41:263-304.
- 774 Keep RF, Jones HC (1990) A morphometric study on the development of the lateral ventricle  
775 choroid plexus, choroid plexus capillaries and ventricular ependyma in the rat. *Brain*  
776 *research Developmental brain research* 56:47-53.
- 777 Lalou AD, Czosnyka M, Donnelly J, Pickard JD, FmedSci, Nabbanja E, Keong NC, Garnett M,  
778 Czosnyka ZH (2018) Cerebral autoregulation, cerebrospinal fluid outflow resistance, and  
779 outcome following cerebrospinal fluid diversion in normal pressure hydrocephalus.  
780 *Journal of neurosurgery* 130:154-162.
- 781 Li Q, Aalling NN, Forstera B, Erturk A, Nedergaard M, Mollgard K, Xavier ALR (2020)  
782 Aquaporin 1 and the Na(+)/K(+)/2Cl(-) cotransporter 1 are present in the leptomeningeal  
783 vasculature of the adult rodent central nervous system. *Fluids and barriers of the CNS*  
784 17:15.
- 785 Liddel SA, Dziegielewska KM, Ek CJ, Habgood MD, Bauer H, Bauer HC, Lindsay H,  
786 Wakefield MJ, Strazielle N, Kratzer I, Mollgard K, Ghersi-Egea JF, Saunders NR (2013)  
787 Mechanisms that determine the internal environment of the developing brain: a  
788 transcriptomic, functional and ultrastructural approach. *PloS one* 8:e65629.
- 789 LoTurco JJ, Owens DF, Heath MJ, Davis MB, Kriegstein AR (1995) GABA and glutamate  
790 depolarize cortical progenitor cells and inhibit DNA synthesis. *Neuron* 15:1287-1298.
- 791 Love MI, Huber W, Anders S (2014) Moderated estimation of fold change and dispersion for  
792 RNA-seq data with DESeq2. *Genome biology* 15:550.
- 793 Lun MP, Johnson MB, Broadbelt KG, Watanabe M, Kang YJ, Chau KF, Springel MW, Malesz  
794 A, Sousa AM, Pletikos M, Adelita T, Calicchio ML, Zhang Y, Holtzman MJ, Lidov HG,  
795 Sestan N, Steen H, Monuki ES, Lehtinen MK (2015) Spatially heterogeneous choroid  
796 plexus transcriptomes encode positional identity and contribute to regional CSF  
797 production. *The Journal of neuroscience : the official journal of the Society for*  
798 *Neuroscience* 35:4903-4916.
- 799 Madan CR (2015) Creating 3D visualizations of MRI data: A brief guide. *F1000Research* 4:466.
- 800 Madry C, Kyrargyri V, Arancibia-Carcamo IL, Jolivet R, Kohsaka S, Bryan RM, Attwell D  
801 (2018) Microglial Ramification, Surveillance, and Interleukin-1beta Release Are  
802 Regulated by the Two-Pore Domain K(+) Channel THIK-1. *Neuron* 97:299-312 e296.
- 803 Milhorat TH, Mosher MB, Hammock MK, Murphy CF (1970) Evidence for choroid-plexus  
804 absorption in hydrocephalus. *The New England journal of medicine* 283:286-289.

- 805 Munk AS, Wang W, Bechet NB, Eltanahy AM, Cheng AX, Sigurdsson B, Benraiss A, Mae MA,  
806 Kress BT, Kelley DH, Betsholtz C, Mollgard K, Meissner A, Nedergaard M, Lundgaard I  
807 (2019) PDGF-B Is Required for Development of the Glymphatic System. *Cell reports*  
808 26:2955-2969 e2953.
- 809 Netsky MG, Shuangshoti S (1975) The choroid plexus in health and disease. Charlottesville:  
810 University Press of Virginia.
- 811 Oreskovic D, Rados M, Klarica M (2017) Role of choroid plexus in cerebrospinal fluid  
812 hydrodynamics. *Neuroscience* 354:69-87.
- 813 Owens DF, Liu X, Kriegstein AR (1999) Changing properties of GABA(A) receptor-mediated  
814 signaling during early neocortical development. *Journal of neurophysiology* 82:570-583.
- 815 Pisella LI, Gaiarsa J-L, Diabira D, Zhang J, Khalilov I, Duan J, Kahle KT, Medina I (2019)  
816 Impaired regulation of KCC2 phosphorylation leads to neuronal network dysfunction and  
817 neurodevelopmental pathology. *Science Signaling* 12:eaay0300.
- 818 Rasmussen R, O'Donnell J, Ding F, Nedergaard M (2020) Interstitial ions: A key regulator of  
819 state-dependent neural activity? *Progress in neurobiology* 193:101802.
- 820 Razzaque MS (2008) Klotho and Na<sup>+</sup>,K<sup>+</sup>-ATPase activity: solving the calcium metabolism  
821 dilemma? *Nephrology, dialysis, transplantation : official publication of the European*  
822 *Dialysis and Transplant Association - European Renal Association* 23:459-461.
- 823 Saunders NR, Dziegielewska KM, Møllgård K, Habgood MD (2018) Physiology and molecular  
824 biology of barrier mechanisms in the fetal and neonatal brain. *The Journal of physiology*  
825 596:5723-5756.
- 826 Schafer DP, Lehrman EK, Kautzman AG, Koyama R, Mardinly AR, Yamasaki R, Ransohoff  
827 RM, Greenberg ME, Barres BA, Stevens B (2012) Microglia sculpt postnatal neural  
828 circuits in an activity and complement-dependent manner. *Neuron* 74:691-705.
- 829 Schindelin J, Arganda-Carreras I, Frise E, Kaynig V, Longair M, Pietzsch T, Preibisch S,  
830 Rueden C, Saalfeld S, Schmid B, Tinevez JY, White DJ, Hartenstein V, Eliceiri K,  
831 Tomancak P, Cardona A (2012) Fiji: an open-source platform for biological-image  
832 analysis. *Nature methods* 9:676-682.
- 833 Schneider CA, Rasband WS, Eliceiri KW (2012) NIH Image to ImageJ: 25 years of image  
834 analysis. *Nature methods* 9:671-675.
- 835 Schuler MH, Lewandowska A, Caprio GD, Skillern W, Upadhyayula S, Kirchhausen T, Shaw  
836 JM, Cunniff B (2017) Miro1-mediated mitochondrial positioning shapes intracellular  
837 energy gradients required for cell migration. *Molecular biology of the cell* 28:2159-2169.
- 838 Shaolin Z, Zhanxiang W, Hao X, Feifei Z, Caiquan H, Donghan C, Jianfeng B, Feng L,  
839 Shanghang S (2015) Hydrocephalus induced via intraventricular kaolin injection in adult  
840 rats. *Folia neuropathologica* 53:60-68.
- 841 Shen MD, Kim SH, McKinstry RC, Gu H, Hazlett HC, Nordahl CW, Emerson RW, Shaw D,  
842 Elison JT, Swanson MR, Fonov VS, Gerig G, Dager SR, Botteron KN, Paterson S,  
843 Schultz RT, Evans AC, Estes AM, Zwaigenbaum L, Styner MA, Amaral DG, Piven J,  
844 Hazlett HC, Chappell C, Dager S, Estes A, Shaw D, Botteron K, McKinstry R,  
845 Constantino J, Pruett J, Schultz R, Zwaigenbaum L, Elison J, Evans AC, Collins DL,

- 846 Pike GB, Fonov V, Kostopoulos P, Das S, Gerig G, Styner M, Gu H, Piven J, Infant  
847 Brain Imaging Study N (2017) Increased Extra-axial Cerebrospinal Fluid in High-Risk  
848 Infants Who Later Develop Autism. *Biological psychiatry* 82:186-193.
- 849 Smith GM, Gallo G (2018) The role of mitochondria in axon development and regeneration.  
850 *Developmental neurobiology* 78:221-237.
- 851 Somasekharan S, Monette MY, Forbush B (2013) Functional expression of human NKCC1 from  
852 a synthetic cassette-based cDNA: introduction of extracellular epitope tags and removal  
853 of cysteines. *PLoS one* 8:e82060.
- 854 Sonnhammer ELL, Heijne Gv, Krogh A (1998) A hidden Markov model for predicting  
855 transmembrane helices in protein sequences. In: In Proc of Sixth Int Conf on Intelligent  
856 Systems for Molecular Biology (Glasgow, J. et al., eds), pp 175-182 Menlo Park, CA:  
857 AAAI Press.
- 858 Sopjani M, Alesutan I, Dermaku-Sopjani M, Gu S, Zelenak C, Munoz C, Velic A, Foller M,  
859 Rosenblatt KP, Kuro-o M, Lang F (2011) Regulation of the Na<sup>+</sup>/K<sup>+</sup> ATPase by Klotho.  
860 *FEBS letters* 585:1759-1764.
- 861 Spassky N, Merkle FT, Flames N, Tramontin AD, Garcia-Verdugo JM, Alvarez-Buylla A (2005)  
862 Adult ependymal cells are postmitotic and are derived from radial glial cells during  
863 embryogenesis. *The Journal of neuroscience : the official journal of the Society for*  
864 *Neuroscience* 25:10-18.
- 865 Steen RG, Mull C, McClure R, Hamer RM, Lieberman JA (2006) Brain volume in first-episode  
866 schizophrenia: systematic review and meta-analysis of magnetic resonance imaging  
867 studies. *The British journal of psychiatry : the journal of mental science* 188:510-518.
- 868 Steffensen AB, Oernbo EK, Stoica A, Gerkau NJ, Barbuskaite D, Tritsaris K, Rose CR,  
869 MacAulay N (2018) Cotransporter-mediated water transport underlying cerebrospinal  
870 fluid formation. *Nature communications* 9:2167.
- 871 Trapnell C, Williams BA, Pertea G, Mortazavi A, Kwan G, van Baren MJ, Salzberg SL, Wold  
872 BJ, Pachter L (2010) Transcript assembly and quantification by RNA-Seq reveals  
873 unannotated transcripts and isoform switching during cell differentiation. *Nature*  
874 *biotechnology* 28:511-515.
- 875 Vinchon M, ReKate H, Kulkarni AV (2012) Pediatric hydrocephalus outcomes: a review. *Fluids*  
876 *and barriers of the CNS* 9:18.
- 877 Vinje V, Eklund A, Mardal KA, Rognes ME, Stoverud KH (2020) Intracranial pressure elevation  
878 alters CSF clearance pathways. *Fluids and barriers of the CNS* 17:29.
- 879 Volpe JJ (2008) Neurology of the newborn. Philadelphia: Saunders/Elsevier.
- 880 Watanabe M, Zhang J, Mansuri MS, Duan J, Karimy JK, Delpire E, Alper SL, Lifton RP,  
881 Fukuda A, Kahle KT (2019) Developmentally regulated KCC2 phosphorylation is  
882 essential for dynamic GABA-mediated inhibition and survival. *Science Signaling*  
883 12:eaaw9315.
- 884 Weiss K, Lazar HP, Kurolap A, Martinez AF, Paperna T, Cohen L, Smeland MF, Whalen S,  
885 Heide S, Keren B, Terhal P, Irving M, Takaku M, Roberts JD, Petrovich RM, Schrier  
886 Vergano SA, Kenney A, Hove H, DeChene E, Quinonez SC, Colin E, Ziegler A, Rumpel

- 887 M, Jain M, Monteil D, Roeder ER, Nugent K, van Haeringen A, Gambello M, Santani A,  
888 Medne L, Krock B, Skraban CM, Zackai EH, Dubbs HA, Smol T, Ghoumid J, Parker MJ,  
889 Wright M, Turnpenny P, Clayton-Smith J, Metcalfe K, Kurumizaka H, Gelb BD, Baris  
890 Feldman H, Campeau PM, Muenke M, Wade PA, Lachlan K (2020) The CHD4-related  
891 syndrome: a comprehensive investigation of the clinical spectrum, genotype-phenotype  
892 correlations, and molecular basis. *Genetics in medicine : official journal of the American  
893 College of Medical Genetics* 22:389-397.
- 894 Williams CJ, Naito T, Arco PG, Seavitt JR, Cashman SM, De Souza B, Qi X, Keables P, Von  
895 Andrian UH, Georgopoulos K (2004) The chromatin remodeler Mi-2beta is required for  
896 CD4 expression and T cell development. *Immunity* 20:719-733.
- 897 Zeuthen T (1994) Cotransport of K<sup>+</sup>, Cl<sup>-</sup> and H<sub>2</sub>O by membrane proteins from choroid plexus  
898 epithelium of *Necturus maculosus*. *The Journal of physiology* 478 ( Pt 2):203-219.
- 899 Zeuthen T, Macaulay N (2012) Cotransport of water by Na<sup>(+)</sup>-K<sup>(+)</sup>-2Cl<sup>(-)</sup> cotransporters  
900 expressed in *Xenopus* oocytes: NKCC1 versus NKCC2. *The Journal of physiology*  
901 590:1139-1154.
- 902 Zhang Y, Huang G, Shornick LP, Roswit WT, Shipley JM, Brody SL, Holtzman MJ (2007) A  
903 transgenic FOXP1-Cre system for gene inactivation in ciliated epithelial cells. *American  
904 journal of respiratory cell and molecular biology* 36:515-519.
- 905

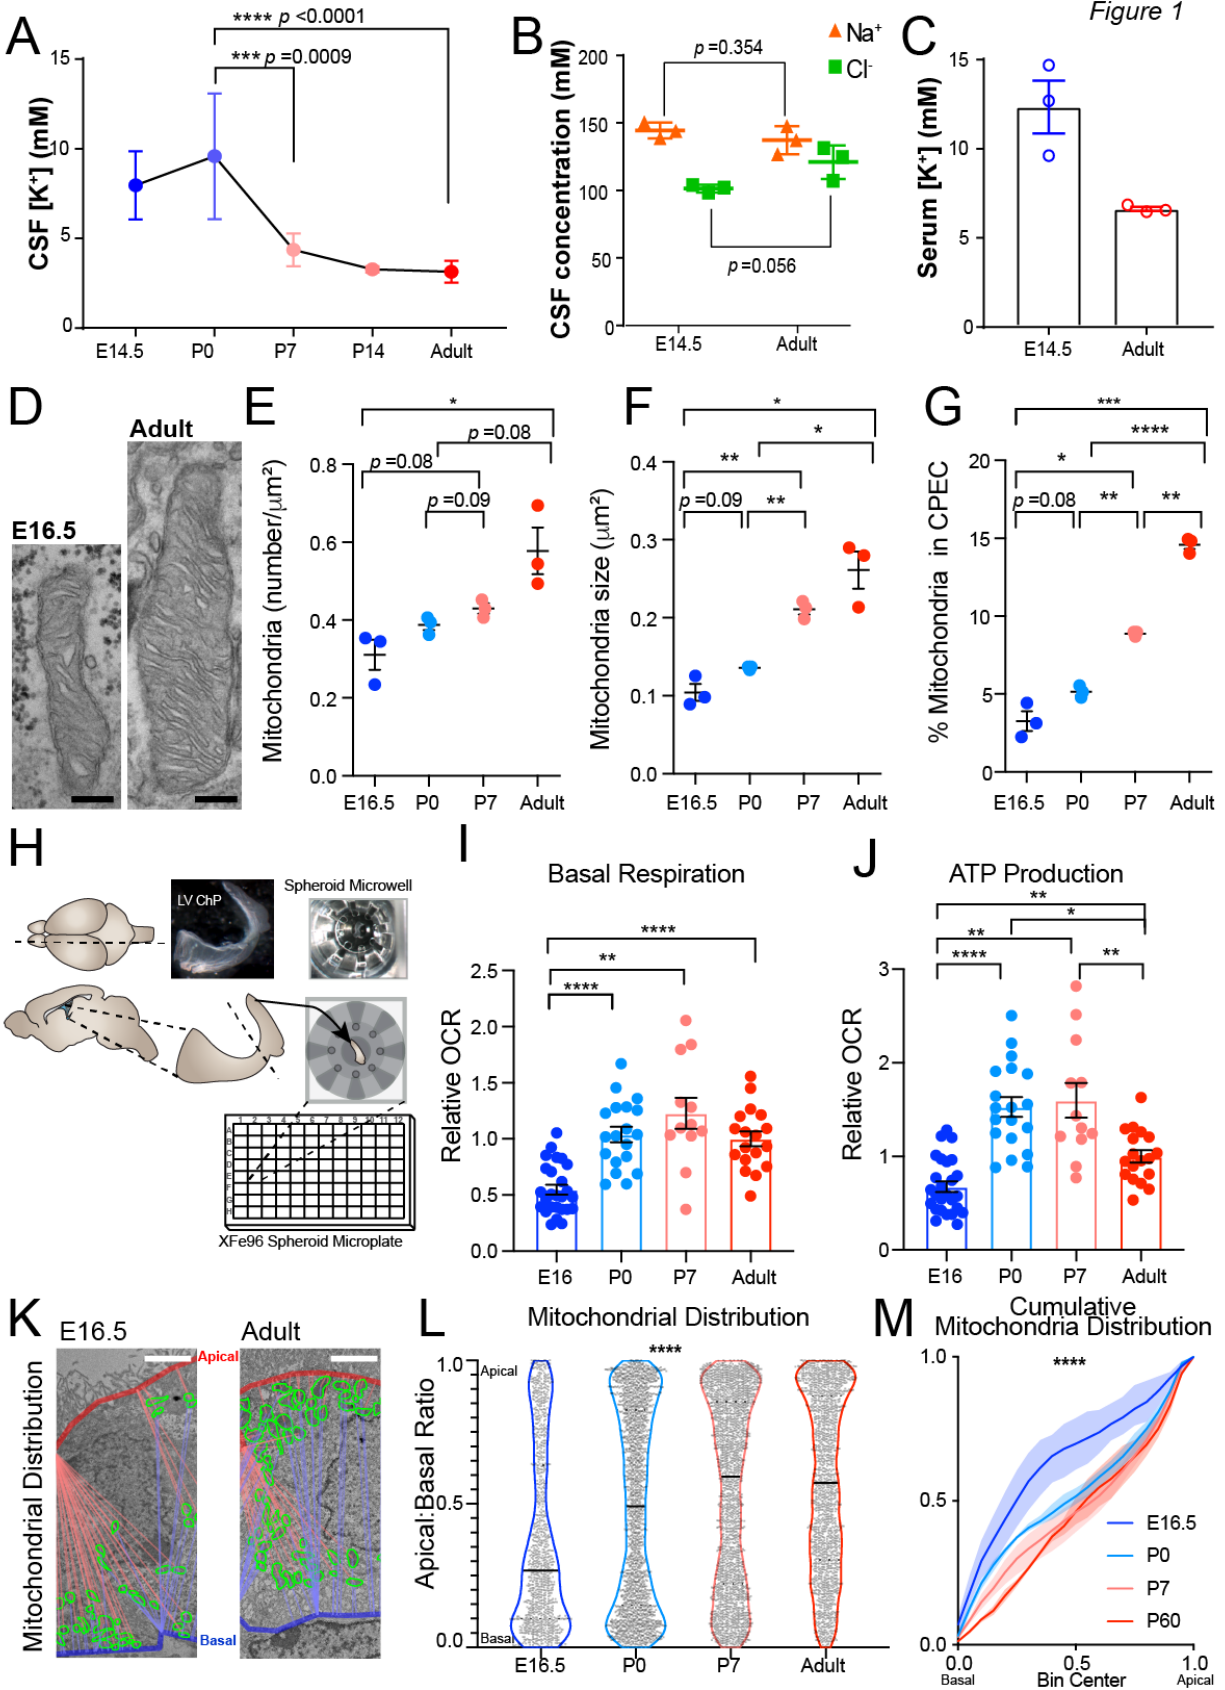

907 **Fig. 1. Postnatal CSF [K<sup>+</sup>] decrease coincides with increased ChP metabolism. (A)** ICP-OES  
908 quantification of CSF [K<sup>+</sup>]. N = 6, \*\*\*\*  $p < 0.0001$  by one-way ANOVA. Sidak's test was used  
909 for P0 vs. P7 and P0 vs. adult comparison. \*\*\*  $p = 0.0009$ , \*\*\*\*  $p < 0.0001$ . **(B)** ICP-OES and  
910 IC measurements of E14.5 and adult mouse CSF [Na<sup>+</sup>] and [Cl<sup>-</sup>]. N=3; Welch's t-test. **(C)** ICP-  
911 OES measurements of embryo vs. adult mouse serum [K<sup>+</sup>]. N=3. **(D)** Transmission micrographs  
912 of mitochondria in LVChP. **(E-G)** Quantification of mitochondrial number **(E)**, area **(F)**, and %  
913 area occupancy **(G)** in ChP epithelial cells. N =3 animals, 5-10 FOV per animal, \* $p < 0.05$ , \*\* $p$   
914  $< 0.01$ , \*\*\* $p < 0.005$ , \*\*\*\* $p < 0.001$ ; Welch's t-test. **(H)** Schematic of explant-based Agilent  
915 Seahorse XFe96 test. **(I-J)** Oxidative respiration metrics over development. \* $p < 0.05$ , \*\* $p <$   
916  $0.01$ , \*\*\*\* $p < 0.0001$ ; Welch's ANOVA with Dunnett's T3 multiple comparison test. **(K-L)**  
917 Mitochondrial distribution between the apical and basal surfaces (Apical: Basal proximity ratio).  
918 1 = apical surface. 0 = basal surface. Solid line indicates median and dashed line indicates  
919 upper/lower quartiles. \*\*\*\*  $p < 0.0001$ ; Kolmogorov–Smirnov test. **(M)** Cumulative distribution  
920 of mitochondrial localization. Solid lines are the mean, shaded area represents the range. Scale  
921 bar (d) = 250nm, (k) = 2 $\mu$ m. Unless otherwise noted, all quantitative data are presented as Mean  
922  $\pm$  SEM.  
923

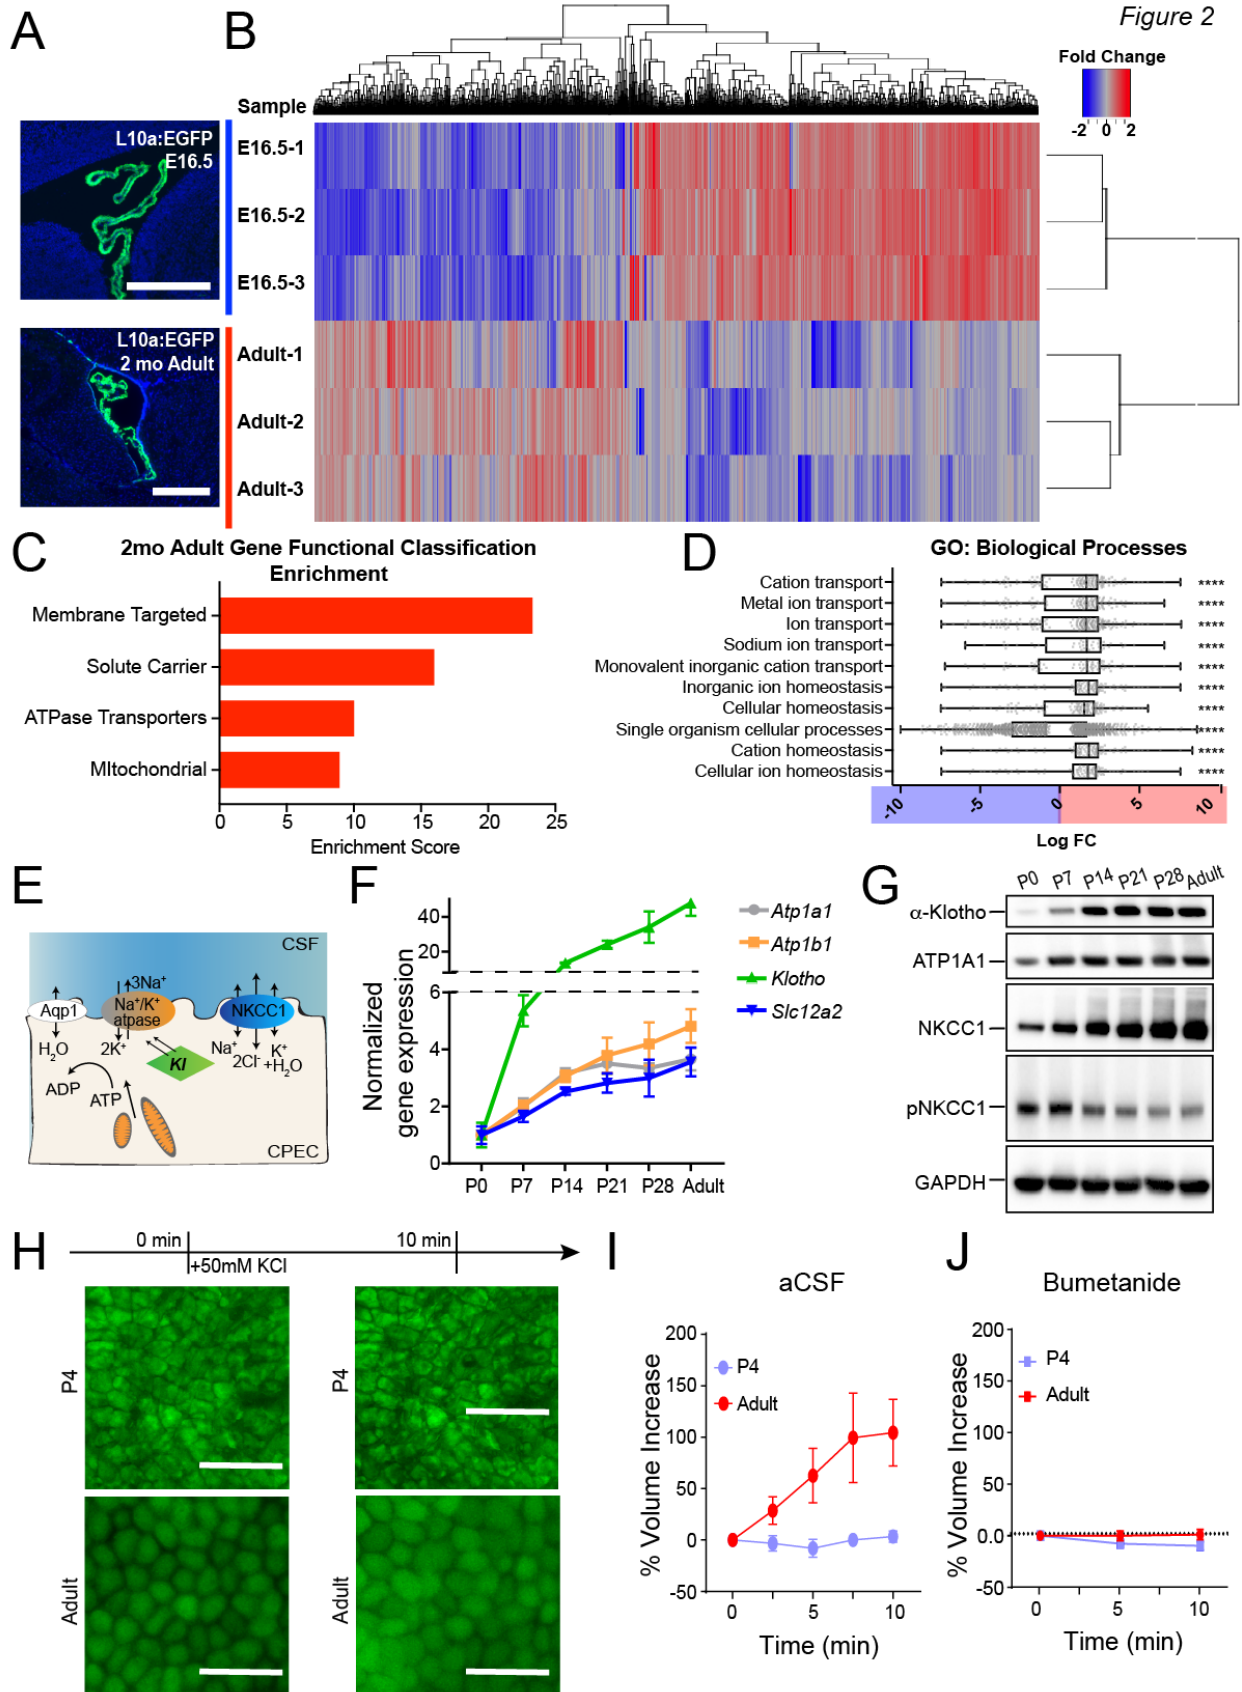



925 **Fig. 2. Choroid plexus epithelial cells display age-dependent translation of ion and water**  
926 **transporters, in particular NKCC1. (A)** Rpl10a-conjugated EGFP expression in ChP epithelial  
927 cells after *Foxj1*-Cre recombination in TRAP-BAC mice. **(B)** Heatmap and hierarchical  
928 clustering of differentially expressed genes (adjusted  $p < 0.05$ ). **(C)** Top 4 gene functional  
929 clusters shown by DAVID to be enriched in Adult ChP epithelial cells over E16.5 ChP epithelial  
930 cells. **(D)** Top 10 significantly enriched gene ontology (GO) terms for “Biological processes”.  
931 Plotted with boxes for quartiles and whiskers for 5<sup>th</sup> and 95<sup>th</sup> percentiles. The  $\log_{10}$  fold change  
932 (LogFC) is plotted for each expressed gene for the network. Positive values (red) indicate Adult  
933 enrichment and negative values (blue) indicate E16.5 enrichment.  $p$  values are corrected for  
934 multiple measures using Bonferroni correction.  $**p \leq 0.01$ ,  $***p \leq 0.001$ ,  $****p \leq 0.0001$ . **(E)**  
935 Schematics demonstrating the interaction of NKCC1,  $\text{Na}^+/\text{K}^+$ -ATPase, and Klotho on the apical  
936 membrane of a ChP epithelial cell (CPEC). **(F-G)** RT-qPCR and immunoblotting of LVChP  
937 during postnatal development. **(H)** Fluorescence images of Calcein-AM labeled epithelial cells  
938 from LVChP explants under high extracellular  $\text{K}^+$  challenge. Scale bar =  $50\mu\text{m}$ . **(I-J)**  
939 Quantification of ChP epithelia cellular volume by IMARIS 3D analysis. Percent volume  
940 increase =  $dV/V_0$  for each timepoint (t).  $V_0$  = initial volume of the cell; t = subsequent timepoint  
941 after addition of challenge;  $dV = V_t - V_0 \times 100\%$ . At least 10 cells were analyzed for each explant  
942 from one animal;  $N = 4$ .

Figure 3

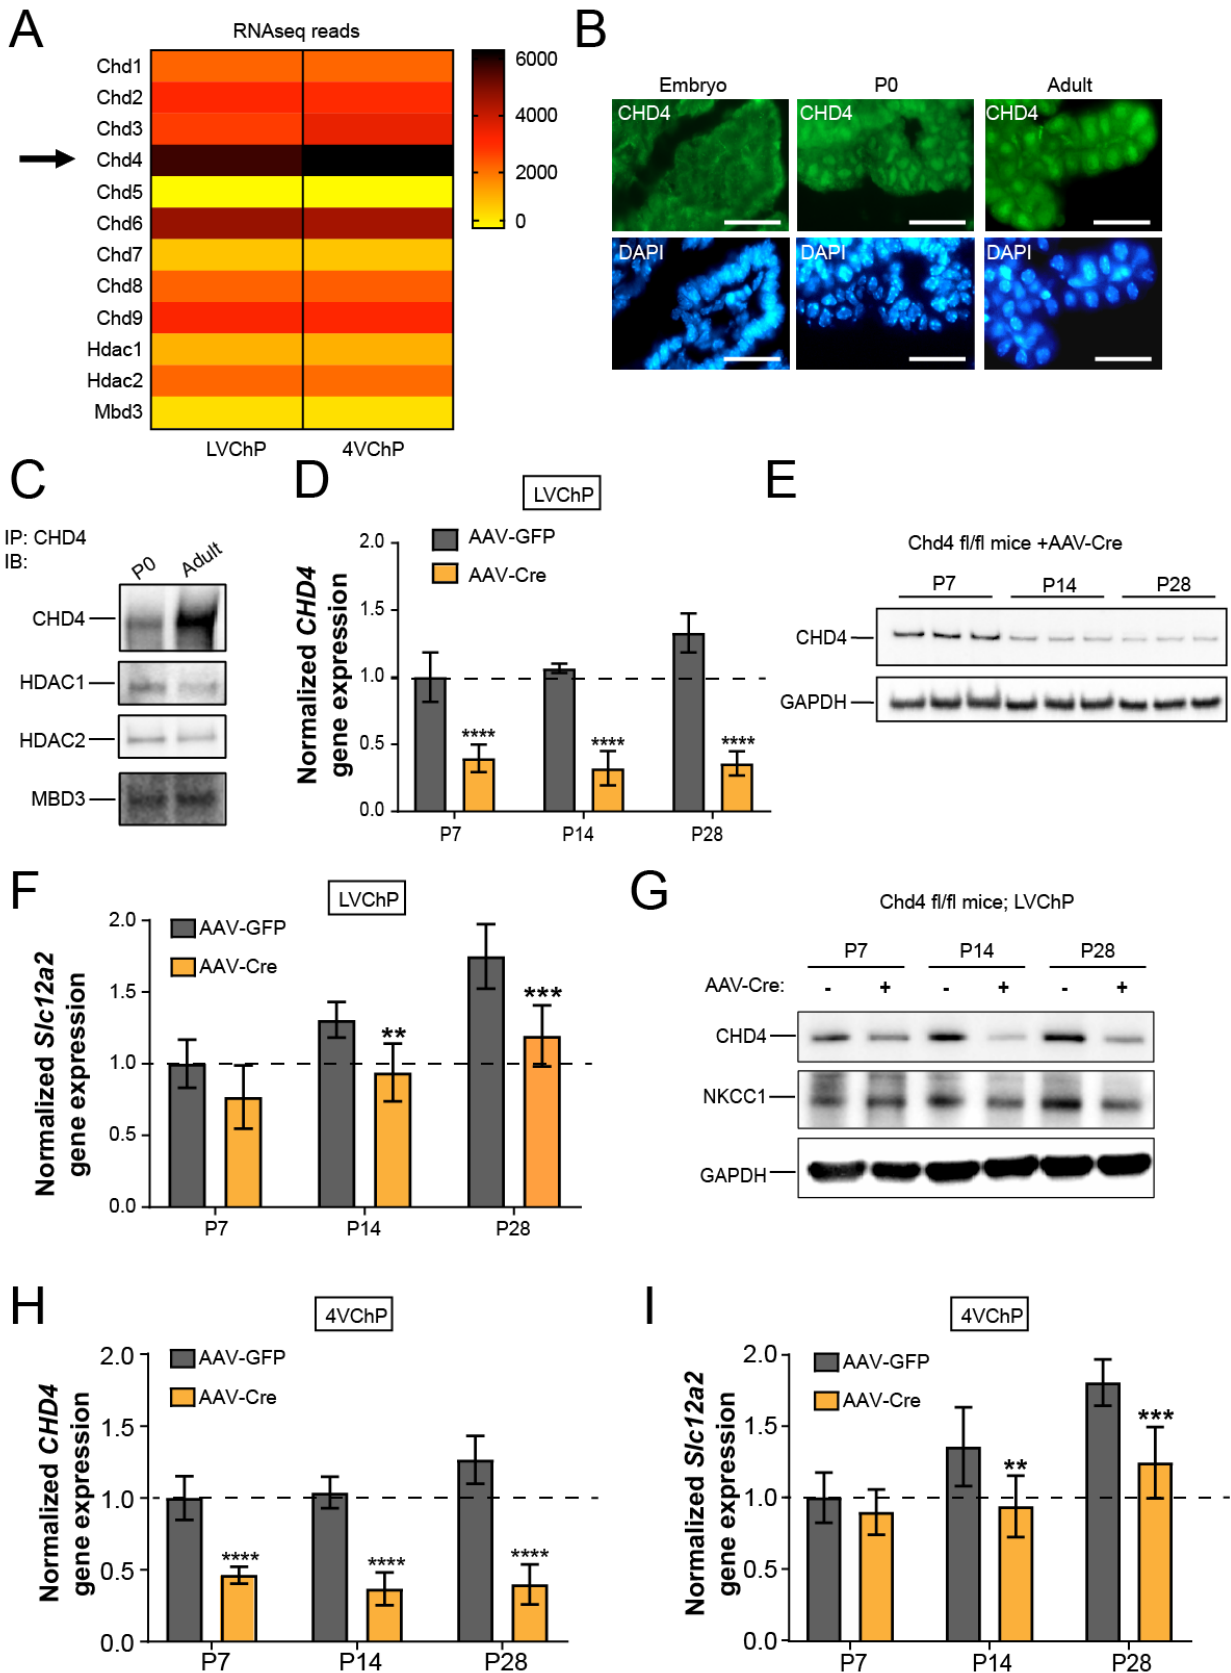

944 **Fig. 3. NKCC1 temporal expression requires CHD4/NuRD complex. (A)** RNAseq data  
945 showing expression of CHD and other NuRD units by the ChP. **(B)** Immunofluorescence images  
946 of CHD4 in the ChP epithelia at E16.5, P0, and adult; Scale bar = 30 $\mu$ m. **(C)** Immunoblots of  
947 Co-IP by CHD4 antibody. **(D)** RT-qPCR of CHD4 transcripts in ChP with AAV2/5-Cre  
948 infection. \*\*\*\*  $p < 0.0001$ ,  $N = 7$ , Welch's t-test. **(E)** Immunoblot of CHD4 in AAV-cre mice  
949 ChP lysate with. **(F)** RT-qPCR of NKCC1 expression in AAV-cre vs. AAV-GFP mice ChP. All  
950 values were normalized to P7 AAV-GFP control mice. \*\* $p = 0.0015$ , \*\*\* $p < 0.001$ ,  $N = 7$ ,  
951 Welch's t-test. **(G)** Immunoblot of NKCC1 in LVChP lysates from AAV-cre vs. AAV-GFP mice.  
952 **(H-I)** CHD4 and NKCC1 RT-qPCR in 4VChP. \*\*  $p = 0.0083$ , \*\*\*  $p < 0.001$ , \*\*\*\*  $p < 0.0001$ ,  
953  $N = 7$ , Welch's t-test.  
954

Figure 4

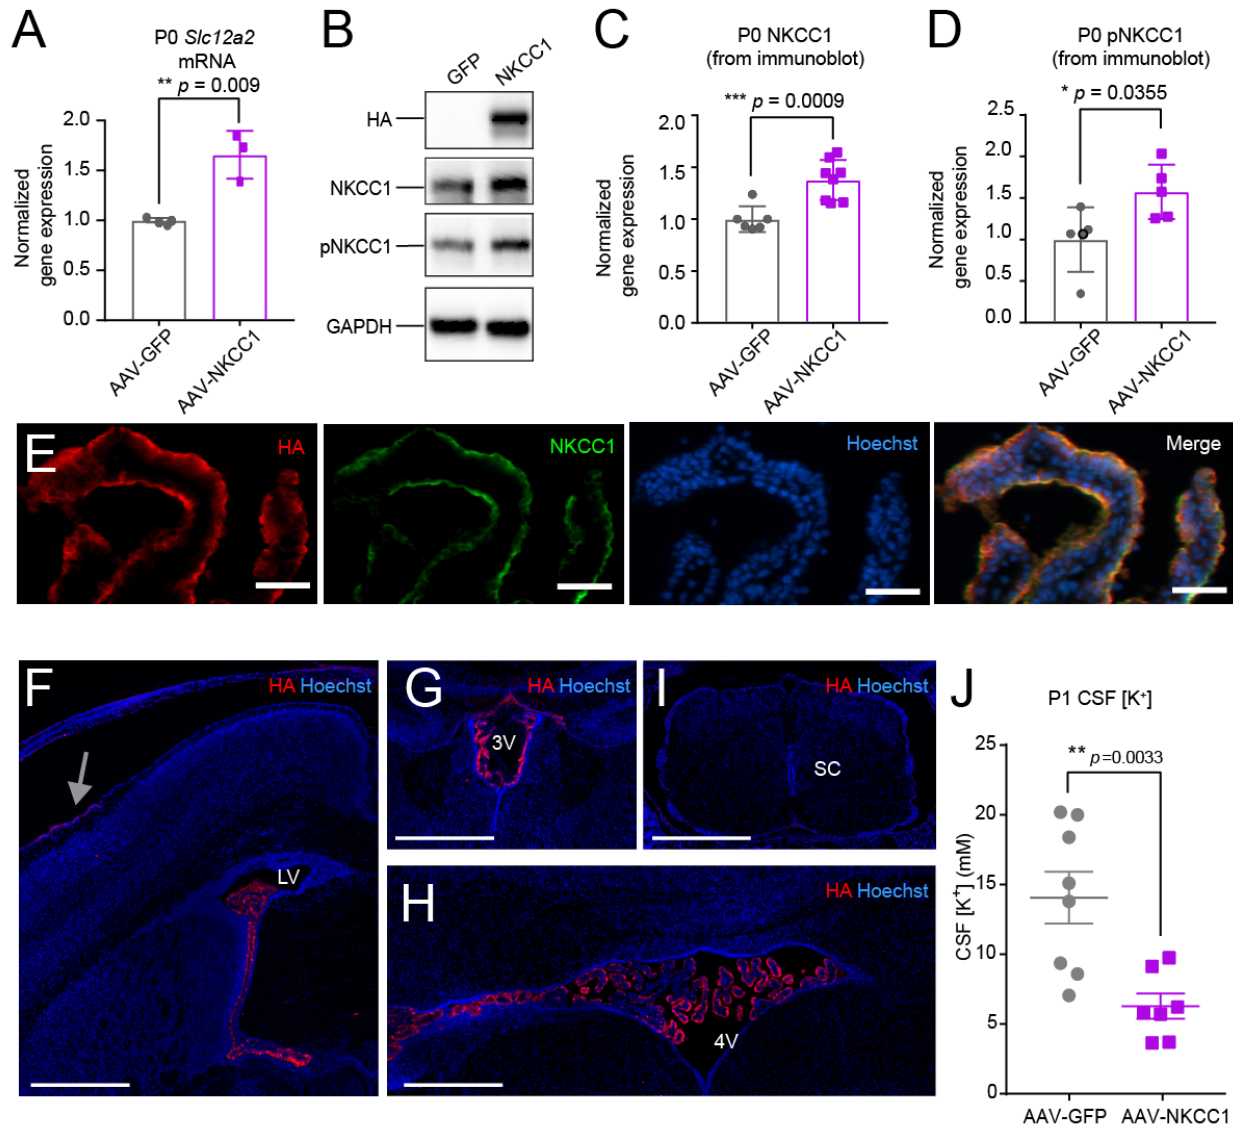

956 **Fig. 4. ChP NKCC1 actively mediates CSF K<sup>+</sup> clearance in the first postnatal week. (A)** RT-  
957 qPCR of NKCC1 mRNA levels in P0 mice. \*\*  $p = 0.009$ , N=3; Welch's t-test. **(B)** Immunoblots  
958 from AAV-NKCC1 vs. AAV-GFP P0 mice ChP lysates. **(C-D)** Quantification of all  
959 immunoblots of NKCC1 **(C)** \*\*\*  $p = 0.0009$ , N=7; Welch's t-test; and pNKCC1 **(D)** \*  $p =$   
960  $0.0355$ , N=5; Welch's t-test. **(E)** Immunofluorescence images showing co-localization of 3xHA  
961 tag and NKCC1 in P0 ChP. Scale bar = 50 $\mu$ m. **(F-I)** Immunofluorescence images of HA in  
962 AAV2/5-NKCC1 transduced brain at P1: the LVChP **(F)**, 3<sup>rd</sup> ventricle ChP (3VChP; **G**), 4VChP  
963 **(H)**, and the spinal cord **(I; sc = spinal cord)**. Traces of HA is shown in the meninges near the  
964 injection site (grey arrow). Scale bar = 500 $\mu$ m. **(J)** ICP-OES measurements of CSF [K<sup>+</sup>] from  
965 AAV-NKCC1 vs. AAV-GFP P1 mice (N = 8 in AAV-GFP cohort; N = 7 in AAV-NKCC1  
966 cohort). \*\* $p = 0.0033$ ; Welch' t-test.

967

968

969

Figure 5

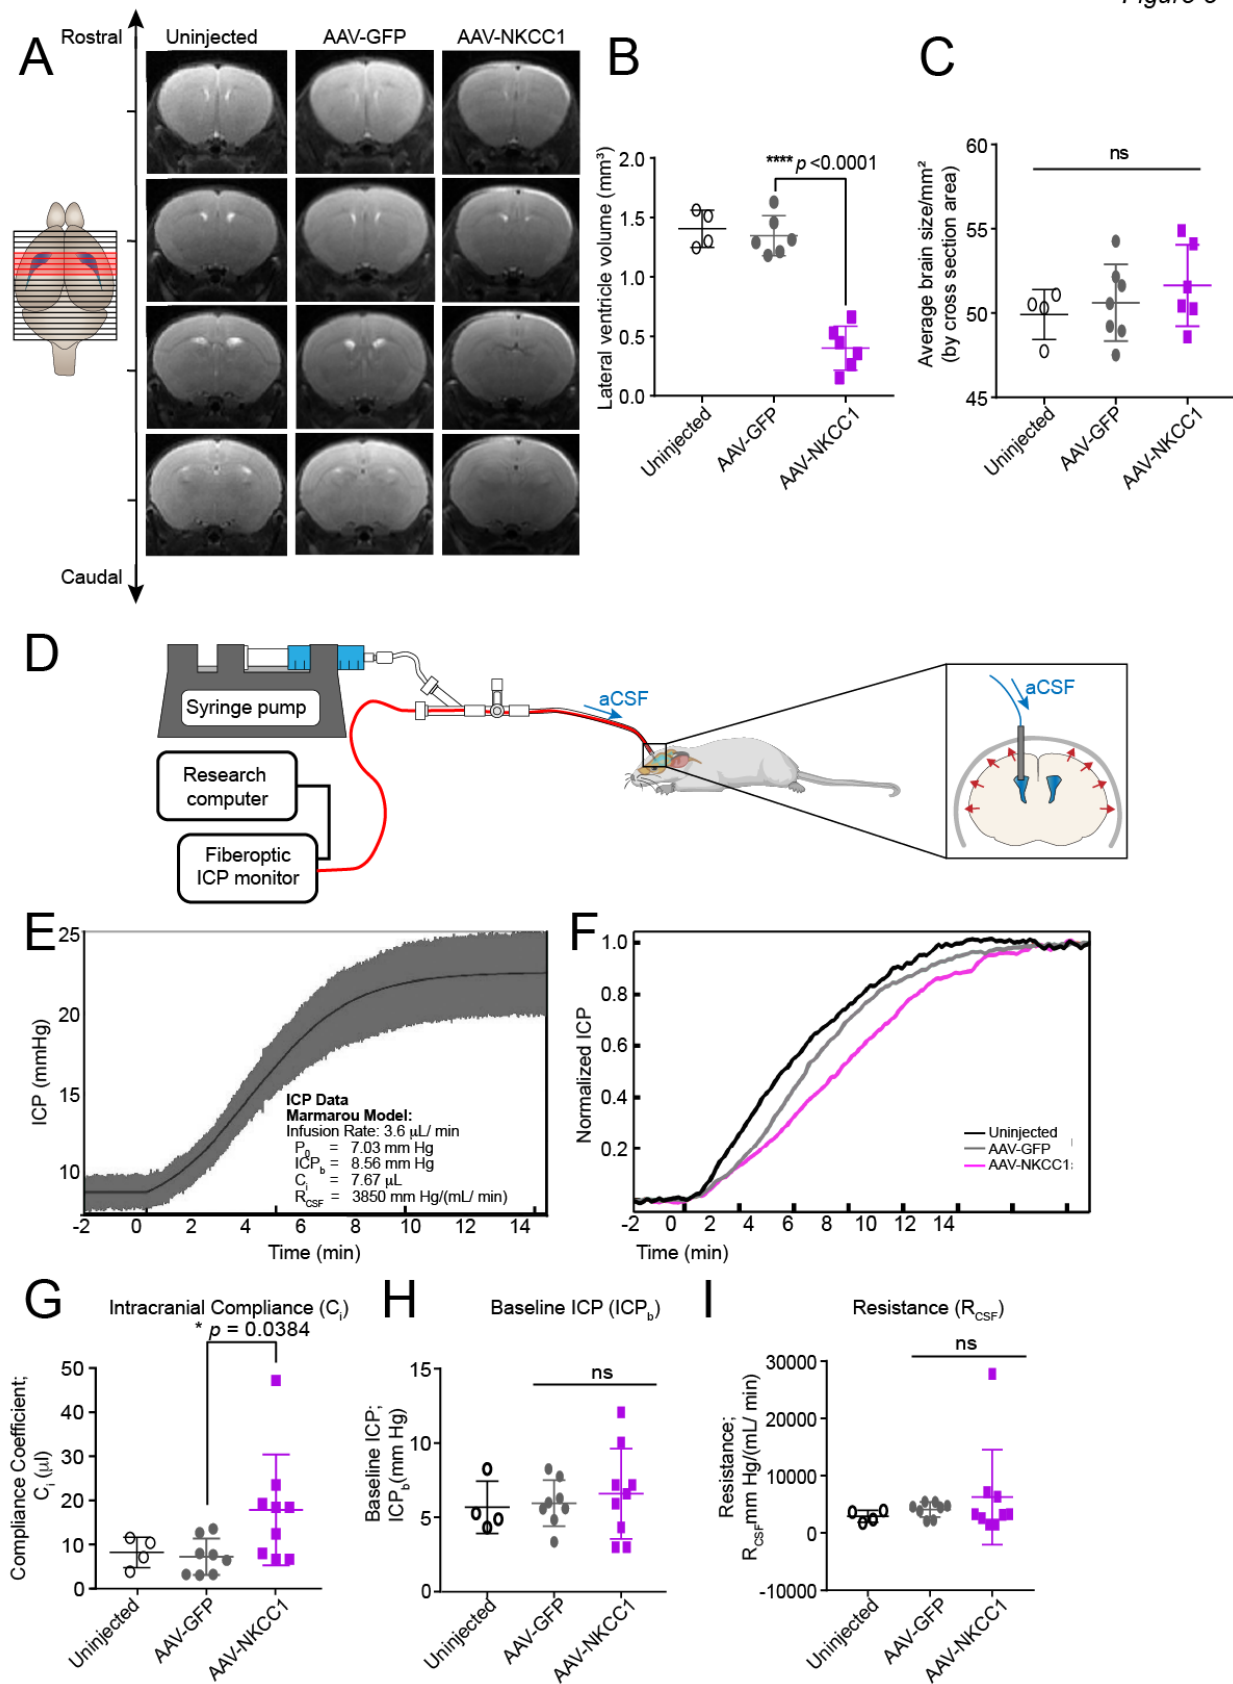

971 **Fig. 5. ChP NKCC1 overexpression reduces brain ventricular volume and increases**  
972 **intracranial compliance. (A)** T2-weighted live MRI images. Only slices with visible LV are  
973 shown (marked red in the schematics). **(B)** LV volumes. Uninjected N = 4; AAV-GFP and AAV-  
974 NKCC1 N = 6; \*\*\*\* $p < 0.0001$ ; Welch's t-test. **(C)** Brain sizes, which are presented as the  
975 average coronal section area from all images with visible ventricles (NKCC1 OE data were  
976 calculated using the matching images to the controls, regardless of ventricles visibility).  
977 Uninjected N = 4; AAV-GFP and AAV-NKCC1 N = 6; Welch's t-test. **(D)** Schematic of *in vivo*  
978 constant rate CSF infusion test. **(E)** Example of ICP curve during the infusion test (infusion  
979 begins at 0 min) in an AAV-GFP mouse, fitted to Marmarou's model. Values extracted include:  
980 baseline ICP ( $ICP_b$ ), a pressure-independent compliance coefficient ( $C_i$ ) and the resistance to  
981 CSF outflow ( $R_{CSF}$ ). **(F)** Example ICP recordings from AAV-NKCC1 mice and controls. For  
982 clarity, data have been low pass filtered to remove the waveform components. **(G)** Compliance  
983 coefficients. Uninjected N = 4; AAV-GFP N = 8; AAV-NKCC1 N = 9; \* $p = 0.0384$ ; Welch's t-  
984 test. **(H-I)** Plots of baseline ICP and resistance to CSF outflow ( $R_{CSF}$ ) at 5-7 weeks. Uninjected  
985 N=4, AAV-GFP N=8, AAV-NKCC1 N=9; Welch's t-test.  
986

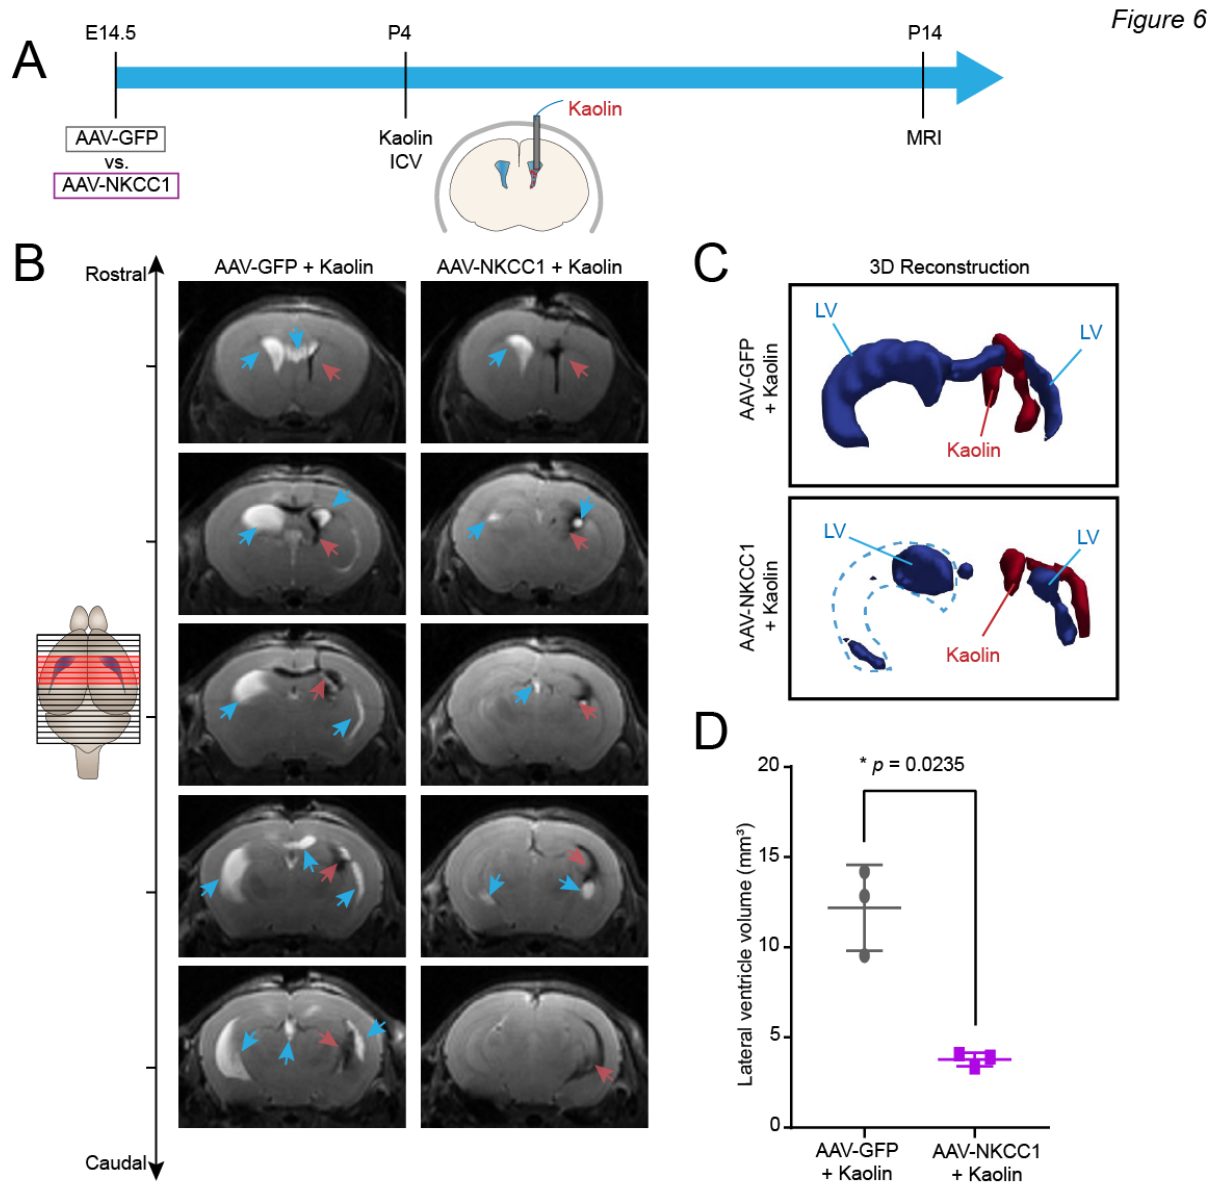



988 **Fig. 6. ChP NKCC1 overexpression mitigates ventriculomegaly in an obstructive**  
989 **hydrocephalus model. (A)** Schematics showing the workflow: E14.5 in utero ICV of AAV2/5-  
990 NKCC1 or AAV2/5-GFP, followed by ICV of kaolin at P4, and MRI at P14. **(B)** Representative  
991 sequential brain images (rostral to caudal) by T2-weighted live MRI images. Blue arrows: LV.  
992 Red arrows: kaolin. **(C)** 3D reconstruction of the LV and kaolin deposition. LV: blue. Kaolin:  
993 red. **(D)** LV volumes. N = 3; \* $p = 0.0235$ ; Welch's t-test.

Figure 7

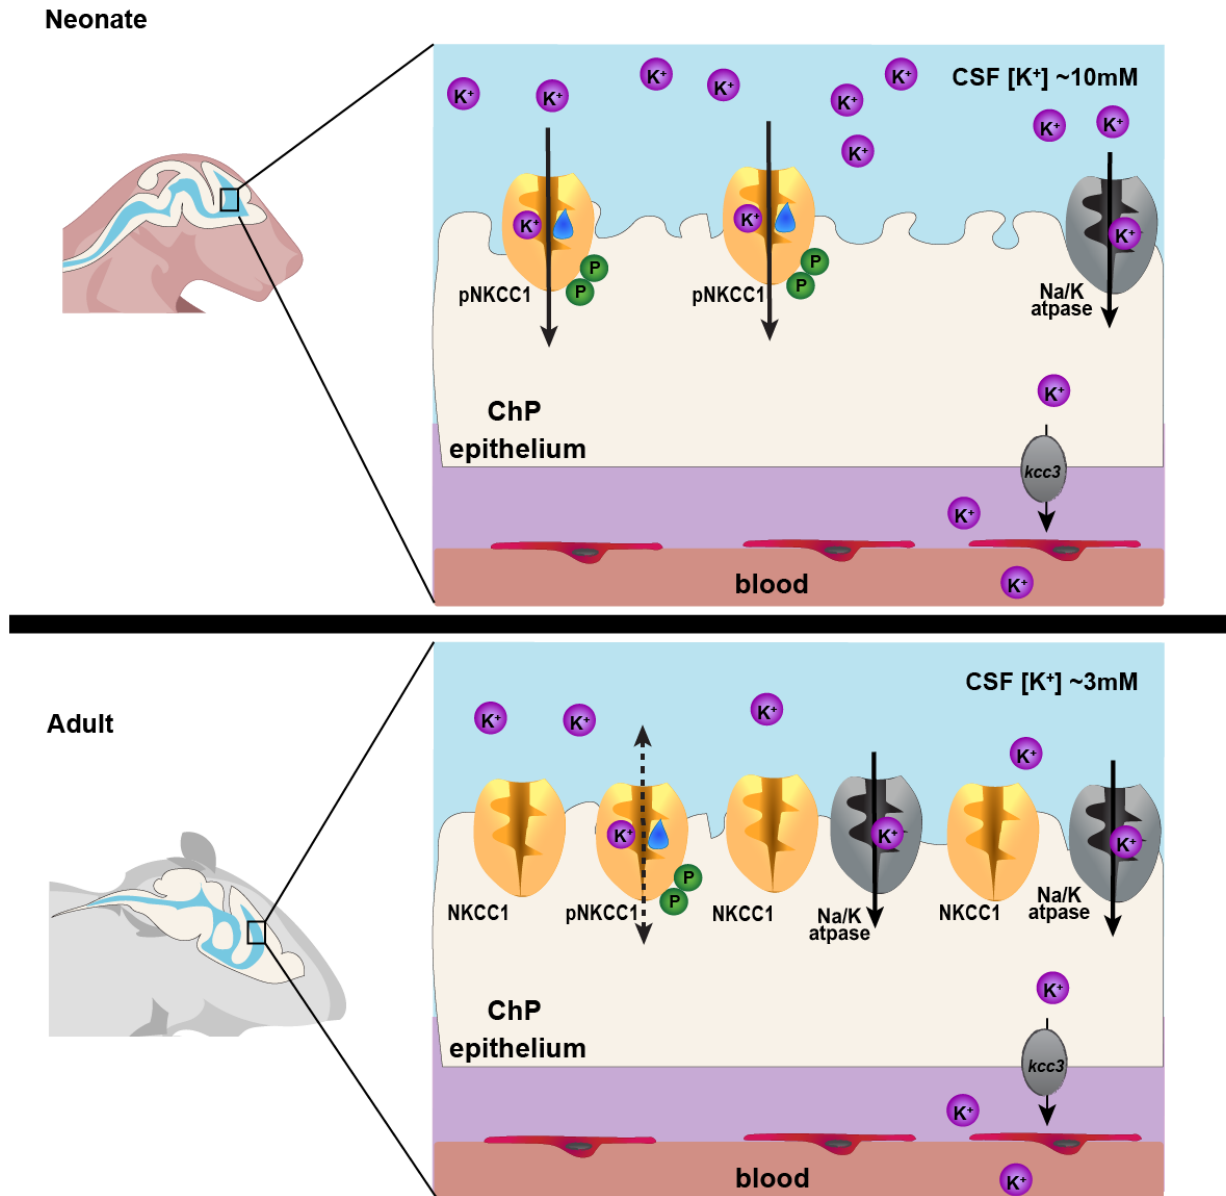

995 **Fig. 7. Working model of ChP NKCC1 mediating K<sup>+</sup>-driven CSF outflow.** The schematics  
996 describes ChP NKCC1 mediated K<sup>+</sup> and water clearance from CSF in neonatal mice, in  
997 comparison to the adult scenario. For simplicity and clarity, only K<sup>+</sup> is depicted among all ions  
998 and only NKCC1 and Na<sup>+</sup>/K<sup>+</sup>-ATPase are included. Neonatal (P0-7, left) ChP has high pNKCC1  
999 than adult, albeit lower total NKCC1. Neonate CSF [K<sup>+</sup>] is 2-3 fold higher than adult. With  
1000 similar [Na<sup>+</sup>] and [Cl<sup>-</sup>], this [K<sup>+</sup>] difference is sufficient to alter the total Nernst potential of  
1001 epithelial cells and bias NKCC1 transport of K<sup>+</sup>, together with water, out of CSF into the ChP in  
1002 neonates.  
1003
